# Supplementary material for: Membrane-Depolarizing Channel Blockers Induce Selective Glioma Cell Death by Impairing Nutrient Transport and Unfolded Protein/Amino Acid Responses
Source: Oxford University Press journal article supplement (doi:10.1158/0008-5472.can-16-2274), 2017-01-13
Supplement: 00085472can162274-sup-170030_1_supp_3736051_6gdlth.xlsx [file 00085472can162274-sup-170030_1_supp_3736051_6gdlth.xlsx]

## Sheet: 2h vs CTL_protein level
Protein IDs	Peptide counts (all)	Peptide counts (razor+unique)	Peptide counts (unique)	Protein names	Gene names	Protein level_Log2 2h/CTL (Average)	p-value
Q9Y2R4	3	3	3	Probable ATP-dependent RNA helicase DDX52	DDX52	1.43971	0.0120832
P09001	5	5	5	39S ribosomal protein L3, mitochondrial	MRPL3	1.04229	0.0077124
Q96GC5	3	3	3	39S ribosomal protein L48, mitochondrial	MRPL48	0.9933	0.0392095
Q9BY67	7	7	7	Cell adhesion molecule 1	CADM1	0.96648	0.0245148
P23527;P33778;Q16778;P06899;Q8N257;Q6DN03;Q6DRA6	15;14;14;13;9;3;3	2;2;2;2;2;2;2	2;2;2;2;2;2;2	Histone H2B type 1-O;Histone H2B type 1-B;Histone H2B type 2-E;Histone H2B type 1-J;Histone H2B type 3-B	HIST1H2BO;HIST1H2BB;HIST2H2BE;HIST1H2BJ;HIST3H2BB	0.93747	0.0279318
Q8IVF7	11	11	8	Formin-like protein 3	FMNL3	0.916604	0.0481524
P0C0S5;Q71UI9	4;4	2;2	2;2	Histone H2A.Z;Histone H2A.V	H2AFZ;H2AFV	0.913697	0.0491937
P54709	9	9	9	Sodium/potassium-transporting ATPase subunit beta-3	ATP1B3	0.897576	0.0173161
Q5QNW6;Q93079;P58876;P62807;Q99877;Q99879;O60814;Q99880;P57053;Q96A08	16;16;15;15;15;15;14;14;13;8	16;16;15;15;15;15;14;14;13;8	3;3;3;3;3;3;3;3;3;0	Histone H2B type 2-F;Histone H2B type 1-H;Histone H2B type 1-D;Histone H2B type 1-C/E/F/G/I;Histone H2B type 1-N;Histone H2B type 1-M;Histone H2B type 1-K;Histone H2B type 1-L;Histone H2B type F-S;Histone H2B type 1-A	HIST2H2BF;HIST1H2BH;HIST1H2BD;HIST1H2BC;HIST1H2BN;HIST1H2BM;HIST1H2BK;HIST1H2BL;H2BFS;HIST1H2BA	0.886849	0.00997643
Q9UHQ4	4	4	4	B-cell receptor-associated protein 29	BCAP29	0.81284	0.0355814
P51572	13	13	13	B-cell receptor-associated protein 31	BCAP31	0.808536	0.0166602
Q96EY1	10	10	10	DnaJ homolog subfamily A member 3, mitochondrial	DNAJA3	0.771829	0.0159692
Q9NYK5	9	9	9	39S ribosomal protein L39, mitochondrial	MRPL39	0.771745	0.0247469
Q9Y3D9	5	5	5	28S ribosomal protein S23, mitochondrial	MRPS23	0.767965	0.0400697
P13521	16	16	16	Secretogranin-2;Secretoneurin	SCG2	0.750006	0.0416934
Q9UJZ1	9	9	9	Stomatin-like protein 2	STOML2	0.749863	0.0451611
Q9Y3B7	10	10	10	39S ribosomal protein L11, mitochondrial	MRPL11	0.741632	0.0184806
Q9UBX3	6	6	6	Mitochondrial dicarboxylate carrier	SLC25A10	0.733152	0.0487137
Q99547	2	2	2	M-phase phosphoprotein 6	MPHOSPH6	0.731009	0.00231665
Q9UKM9	11	11	11	RNA-binding protein Raly	RALY	0.727935	0.032135
O15439	7	7	7	Multidrug resistance-associated protein 4	ABCC4	0.720687	0.027315
P51674	6	6	5	Neuronal membrane glycoprotein M6-a	GPM6A	0.711054	0.0137673
Q9Y2R9	8	8	8	28S ribosomal protein S7, mitochondrial	MRPS7	0.695934	0.0135832
Q15287	4	4	4	RNA-binding protein with serine-rich domain 1	RNPS1	0.669843	0.00118367
O00592	2	2	2	Podocalyxin	PODXL	0.652173	0.00277513
O00566	5	5	5	U3 small nucleolar ribonucleoprotein protein MPP10	MPHOSPH10	0.65006	0.0294838
P28331	21	21	21	NADH-ubiquinone oxidoreductase 75 kDa subunit, mitochondrial	NDUFS1	0.644349	0.0363964
Q15643	29	29	29	Thyroid receptor-interacting protein 11	TRIP11	0.636296	0.0208948
P04899;P19087	16;2	16;2	11;0	Guanine nucleotide-binding protein G(i) subunit alpha-2	GNAI2	0.622243	0.0290465
Q86VM9	17	17	17	Zinc finger CCCH domain-containing protein 18	ZC3H18	0.61438	0.00472835
Q96J84	6	6	6	Kin of IRRE-like protein 1	KIRREL	0.611582	0.0120158
Q13077	4	4	4	TNF receptor-associated factor 1	TRAF1	0.607232	0.0222831
O75694	24	24	24	Nuclear pore complex protein Nup155	NUP155	0.603913	0.0304267
Q96I99	12	12	12	Succinyl-CoA ligase [GDP-forming] subunit beta, mitochondrial	SUCLG2	0.596967	0.0431351
Q92665	5	5	5	28S ribosomal protein S31, mitochondrial	MRPS31	0.590466	0.0122076
Q8WWI5	3	3	3	Choline transporter-like protein 1	SLC44A1	0.583166	0.011515
P54289	12	12	12	Voltage-dependent calcium channel subunit alpha-2/delta-1;Voltage-dependent calcium channel subunit alpha-2-1;Voltage-dependent calcium channel subunit delta-1	CACNA2D1	0.582845	0.0067564
Q5SY16	4	4	4	Polynucleotide 5-hydroxyl-kinase NOL9	NOL9	0.582556	0.0416494
P23229	5	5	5	Integrin alpha-6;Integrin alpha-6 heavy chain;Integrin alpha-6 light chain	ITGA6	0.58156	0.0384648
P23634	18	9	8	Plasma membrane calcium-transporting ATPase 4	ATP2B4	0.581207	0.0342923
Q9Y314	8	8	8	Nitric oxide synthase-interacting protein	NOSIP	-0.580691	0.0424643
Q9BQA1	8	8	8	Methylosome protein 50	WDR77	-0.582318	0.0104402
Q14651	7	4	4	Plastin-1	PLS1	-0.589985	0.0131526
P13693;Q56UQ5;Q9HAU6	9;2;1	9;2;1	9;2;1	Translationally-controlled tumor protein	TPT1	-0.606291	0.0474258
O95479	8	8	8	GDH/6PGL endoplasmic bifunctional protein;Glucose 1-dehydrogenase;6-phosphogluconolactonase	H6PD	-0.624414	0.0323124
Q9UNN5	8	8	8	FAS-associated factor 1	FAF1	-0.632532	0.0282912
P30626	10	10	10	Sorcin	SRI	-0.65139	0.0123511
P04818	11	11	11	Thymidylate synthase	TYMS	-0.654066	0.00623353
Q9GZP4	5	5	5	PITH domain-containing protein 1	PITHD1	-0.659958	0.00886536
O43447	6	4	4	Peptidyl-prolyl cis-trans isomerase H	PPIH	-0.67552	0.0310415
Q9BWE0	2	2	2	Replication initiator 1	REPIN1	-0.688582	0.0101059
P61024	2	2	2	Cyclin-dependent kinases regulatory subunit 1	CKS1B	-0.700966	0.0432206
Q9NRX4	4	4	4	14 kDa phosphohistidine phosphatase	PHPT1	-0.740191	0.00382007
Q9Y281	9	7	7	Cofilin-2	CFL2	-0.741831	0.0281034
Q8WUZ0	4	4	4	B-cell CLL/lymphoma 7 protein family member C	BCL7C	-0.744737	0.0286281
P50479	13	13	13	PDZ and LIM domain protein 4	PDLIM4	-0.745769	0.00596945
P53602	9	9	9	Diphosphomevalonate decarboxylase	MVD	-0.746301	0.0019774
Q13243	4	3	3	Serine/arginine-rich splicing factor 5	SRSF5	-0.748982	0.0159514
O14907	2	2	2	Tax1-binding protein 3	TAX1BP3	-0.752291	0.0302407
Q15654	17	17	17	Thyroid receptor-interacting protein 6	TRIP6	-0.753912	0.0235352
P12955	10	10	10	Xaa-Pro dipeptidase	PEPD	-0.808892	0.0390195
P60900	11	11	11	Proteasome subunit alpha type-6	PSMA6	-0.809137	0.00567212
P17029	6	6	6	Zinc finger protein with KRAB and SCAN domains 1	ZKSCAN1	-0.84597	0.0338993
P62942	5	5	5	Peptidyl-prolyl cis-trans isomerase FKBP1A	FKBP1A	-0.877994	0.0430865
O15540;Q8NCS4	7;1	7;1	7;1	Fatty acid-binding protein, brain	FABP7	-0.881817	0.0190485
P38936	5	5	5	Cyclin-dependent kinase inhibitor 1	CDKN1A	-0.936626	0.0193663
P09234	4	4	4	U1 small nuclear ribonucleoprotein C	SNRPC	-0.942899	0.00550424
P53634	10	10	10	Dipeptidyl peptidase 1;Dipeptidyl peptidase 1 exclusion domain chain;Dipeptidyl peptidase 1 heavy chain;Dipeptidyl peptidase 1 light chain	CTSC	-1.01714	0.0325098
Q9BUH6	6	6	6	Uncharacterized protein C9orf142	C9orf142	-1.03192	0.0405024
P08962	3	3	3	CD63 antigen	CD63	-1.05565	0.0275361
Q13526	7	7	7	Peptidyl-prolyl cis-trans isomerase NIMA-interacting 1	PIN1	-1.10089	0.0252873
Q9BV68	3	3	3	RING finger protein 126	RNF126	-1.10374	0.000378905
P45880	10	10	10	Voltage-dependent anion-selective channel protein 2	VDAC2	-1.12937	0.0346954
Q53GG5	2	2	2	PDZ and LIM domain protein 3	PDLIM3	-1.13236	0.0134393
P00505	17	17	17	Aspartate aminotransferase, mitochondrial	GOT2	-1.16411	0.00594286
Q04837	5	5	5	Single-stranded DNA-binding protein, mitochondrial	SSBP1	-1.17173	0.00843859
P30086	11	11	11	Phosphatidylethanolamine-binding protein 1;Hippocampal cholinergic neurostimulating peptide	PEBP1	-1.3035	0.0315141
Q9UFW8	6	6	6	CGG triplet repeat-binding protein 1	CGGBP1	-1.32496	0.0155461
Q92997	3	3	2	Segment polarity protein dishevelled homolog DVL-3	DVL3	-1.33958	0.00701009
P62633	7	7	7	Cellular nucleic acid-binding protein	CNBP	-1.36105	0.000995198
Q15056	11	11	11	Eukaryotic translation initiation factor 4H	EIF4H	-1.46024	0.0110305
Q01469;A8MUU1	8;1	8;1	8;1	Fatty acid-binding protein, epidermal	FABP5	-1.74571	0.015032
P68036	6	6	6	Ubiquitin-conjugating enzyme E2 L3	UBE2L3	-1.92919	0.0476344
Q93062	3	3	2	RNA-binding protein with multiple splicing	RBPMS	-2.05134	0.00426438

## Sheet: 6h vs CTL_protein level
Protein IDs	Peptide counts (all)	Peptide counts (razor+unique)	Peptide counts (unique)	Protein names	Gene names	Protein level_Log2 6h/CTL (Average)	p-value
P24593	11	11	11	Insulin-like growth factor-binding protein 5	IGFBP5	1.46815	0.00463291
P13521	16	16	16	Secretogranin-2;Secretoneurin	SCG2	1.46107	0.00446076
P00750	15	15	15	Tissue-type plasminogen activator;Tissue-type plasminogen activator chain A;Tissue-type plasminogen activator chain B	PLAT	1.4011	0.010788
Q9BT88	8	8	8	Synaptotagmin-11	SYT11	1.31144	0.00424621
Q86SF2	8	8	8	N-acetylgalactosaminyltransferase 7	GALNT7	1.14765	0.00581538
O00566	5	5	5	U3 small nucleolar ribonucleoprotein protein MPP10	MPHOSPH10	1.14674	0.0485714
P13500;P80075;P80098	2;1;1	2;1;1	2;1;1	C-C motif chemokine 2;C-C motif chemokine 8;MCP-2(6-76);C-C motif chemokine 7	CCL2;CCL8;CCL7	1.13389	0.0431504
P09601	8	8	8	Heme oxygenase 1	HMOX1	1.09633	0.0341439
Q9UKM7	4	4	4	Endoplasmic reticulum mannosyl-oligosaccharide 1,2-alpha-mannosidase	MAN1B1	1.08284	0.0046271
Q9UBX3	6	6	6	Mitochondrial dicarboxylate carrier	SLC25A10	1.08059	0.0129113
Q9P1Z2	3	3	3	Calcium-binding and coiled-coil domain-containing protein 1	CALCOCO1	0.957642	0.00481208
Q5SZK8	17	17	17	FRAS1-related extracellular matrix protein 2	FREM2	0.948053	0.00143758
Q8WUY1	5	5	5	UPF0670 protein THEM6	THEM6	0.931633	0.0309985
P08253	14	14	14	72 kDa type IV collagenase;PEX	MMP2	0.919709	0.00174908
Q8WUJ3	15	15	15	Protein KIAA1199	KIAA1199	0.908249	0.00641312
P29279	10	10	10	Connective tissue growth factor	CTGF	0.898969	0.012918
Q96QV6;P04908;P0C0S8;P20671;Q6FI13;Q7L7L0;Q93077;Q16777;Q9BTM1;Q96KK5;Q99878	5;5;5;5;5;5;5;5;5;5;5	5;5;5;5;5;5;5;5;5;5;5	1;1;1;1;1;1;1;1;1;1;1	Histone H2A type 1-A;Histone H2A type 1-B/E;Histone H2A type 1;Histone H2A type 1-D;Histone H2A type 2-A;Histone H2A type 3;Histone H2A type 1-C;Histone H2A type 2-C;Histone H2A.J;Histone H2A type 1-H;Histone H2A type 1-J	HIST1H2AA;HIST1H2AB;HIST1H2AG;HIST1H2AD;HIST2H2AA3;HIST3H2A;HIST1H2AC;HIST2H2AC;H2AFJ;HIST1H2AH;HIST1H2AJ	0.886069	0.0063572
O00622	8	8	8	Protein CYR61	CYR61	0.870266	0.0147183
Q24JP5	10	10	10	Transmembrane protein 132A	TMEM132A	0.856548	0.0347398
P09001	5	5	5	39S ribosomal protein L3, mitochondrial	MRPL3	0.853011	0.042811
Q9Y697	3	3	3	Cysteine desulfurase, mitochondrial	NFS1	0.833443	0.00634419
P08195	18	18	18	4F2 cell-surface antigen heavy chain	SLC3A2	0.801738	0.00802197
Q5SYE7	5	5	5	NHS-like protein 1	NHSL1	0.789771	0.0183204
Q9BY67	7	7	7	Cell adhesion molecule 1	CADM1	0.784448	0.0165485
Q15005	6	6	6	Signal peptidase complex subunit 2	SPCS2	0.775542	0.012055
Q5QNW6;Q93079;P58876;P62807;Q99877;Q99879;O60814;Q99880;P57053;Q96A08	16;16;15;15;15;15;14;14;13;8	16;16;15;15;15;15;14;14;13;8	3;3;3;3;3;3;3;3;3;0	Histone H2B type 2-F;Histone H2B type 1-H;Histone H2B type 1-D;Histone H2B type 1-C/E/F/G/I;Histone H2B type 1-N;Histone H2B type 1-M;Histone H2B type 1-K;Histone H2B type 1-L;Histone H2B type F-S;Histone H2B type 1-A	HIST2H2BF;HIST1H2BH;HIST1H2BD;HIST1H2BC;HIST1H2BN;HIST1H2BM;HIST1H2BK;HIST1H2BL;H2BFS;HIST1H2BA	0.774559	0.00988394
P35052	13	13	13	Glypican-1;Secreted glypican-1	GPC1	0.767118	0.0107253
Q15392	8	8	8	Delta(24)-sterol reductase	DHCR24	0.766779	0.00160493
Q9Y3A2	5	5	5	Probable U3 small nucleolar RNA-associated protein 11	UTP11L	0.749806	0.0486772
Q9NV06	4	4	4	DDB1- and CUL4-associated factor 13	DCAF13	0.735378	0.0254539
P02751	31	31	31	Fibronectin;Anastellin;Ugl-Y1;Ugl-Y2;Ugl-Y3	FN1	0.733644	0.00647793
O14672	8	8	8	Disintegrin and metalloproteinase domain-containing protein 10	ADAM10	0.731444	0.0204931
Q16850	14	14	14	Lanosterol 14-alpha demethylase	CYP51A1	0.727006	0.0177283
Q9BVT8	3	3	3	Transmembrane and ubiquitin-like domain-containing protein 1	TMUB1	0.721591	0.0155628
Q8IZV5	5	5	5	Retinol dehydrogenase 10	RDH10	0.719081	0.0425676
O00461	9	9	9	Golgi integral membrane protein 4	GOLIM4	0.717678	0.0102767
O75367	20	20	18	Core histone macro-H2A.1	H2AFY	0.709261	0.00273605
Q9P0I2	6	6	6	Transmembrane protein 111	TMEM111	0.708496	0.00256983
Q9NW15	4	4	4	Anoctamin-10	ANO10	0.700558	0.0394762
Q9NZU0;Q9NZU1	6;1	6;1	6;1	Leucine-rich repeat transmembrane protein FLRT3	FLRT3	0.678342	0.013136
P20674	2	2	2	Cytochrome c oxidase subunit 5A, mitochondrial	COX5A	0.67717	0.0080025
Q13501	15	15	15	Sequestosome-1	SQSTM1	0.676117	0.0161981
Q9P032	5	5	5	NADH dehydrogenase [ubiquinone] 1 alpha subcomplex assembly factor 4	NDUFAF4	0.674129	0.0178733
O95182	5	5	5	NADH dehydrogenase [ubiquinone] 1 alpha subcomplex subunit 7	NDUFA7	0.672893	0.0496398
Q15738	11	11	11	Sterol-4-alpha-carboxylate 3-dehydrogenase, decarboxylating	NSDHL	0.670659	0.0205329
P53007	9	9	9	Tricarboxylate transport protein, mitochondrial	SLC25A1	0.667907	0.0140814
P30460;P30479;P30480;Q04826;P01889	10;10;10;8;6	6;6;6;6;4	0;0;0;0;0	HLA class I histocompatibility antigen, B-8 alpha chain;HLA class I histocompatibility antigen, B-41 alpha chain;HLA class I histocompatibility antigen, B-42 alpha chain;HLA class I histocompatibility antigen, B-40 alpha chain;HLA class I histocompatibility antigen, B-7 alpha chain	HLA-B	0.66612	0.0158763
Q9UGP8	15	15	15	Translocation protein SEC63 homolog	SEC63	0.664119	0.000596058
P19474	4	4	4	E3 ubiquitin-protein ligase TRIM21	TRIM21	0.664088	0.00389217
Q96KR6	3	3	3	Protein FAM210B	FAM210B	0.658646	0.040171
Q13449	5	5	5	Limbic system-associated membrane protein	LSAMP	0.649692	0.0291804
O95563	3	3	3	Brain protein 44	BRP44	0.646808	0.0254676
P21589	10	10	10	5-nucleotidase	NT5E	0.64361	0.0432492
P14406	2	2	2	Cytochrome c oxidase subunit 7A2, mitochondrial	COX7A2	0.642132	0.0120728
Q96J84	6	6	6	Kin of IRRE-like protein 1	KIRREL	0.638707	0.00653795
Q92692	6	6	6	Poliovirus receptor-related protein 2	PVRL2	0.637935	0.0258171
P0C0S5;Q71UI9	4;4	2;2	2;2	Histone H2A.Z;Histone H2A.V	H2AFZ;H2AFV	0.637873	0.0121935
O75964	5	5	5	ATP synthase subunit g, mitochondrial	ATP5L	0.634005	0.0160812
Q5SY16	4	4	4	Polynucleotide 5-hydroxyl-kinase NOL9	NOL9	0.627825	0.0390509
P42167	16	8	8	Lamina-associated polypeptide 2, isoforms beta/gamma;Thymopoietin;Thymopentin	TMPO	0.62499	0.0471274
Q9UBI6	3	3	3	Guanine nucleotide-binding protein G(I)/G(S)/G(O) subunit gamma-12	GNG12	0.624335	0.0121353
P18065	12	12	12	Insulin-like growth factor-binding protein 2	IGFBP2	0.620461	0.00180238
P50895	9	9	9	Basal cell adhesion molecule	BCAM	0.615259	0.031762
O60262	2	2	2	Guanine nucleotide-binding protein G(I)/G(S)/G(O) subunit gamma-7	GNG7	0.613154	0.012786
P05026	4	4	4	Sodium/potassium-transporting ATPase subunit beta-1	ATP1B1	0.612746	0.0193124
A4D1E9	3	3	3	GTP-binding protein 10	GTPBP10	0.612494	0.0156409
P09486	10	10	10	SPARC	SPARC	0.609314	0.00977602
P12236	20	20	4	ADP/ATP translocase 3	SLC25A6	0.608305	0.015027
P84095	9	8	8	Rho-related GTP-binding protein RhoG	RHOG	0.608178	0.0106937
Q16718	4	4	4	NADH dehydrogenase [ubiquinone] 1 alpha subcomplex subunit 5	NDUFA5	0.602362	0.00198923
Q15287	4	4	4	RNA-binding protein with serine-rich domain 1	RNPS1	0.60176	0.00744458
Q9HD45	9	9	9	Transmembrane 9 superfamily member 3	TM9SF3	0.60138	0.0335092
Q8NHH9	8	7	7	Atlastin-2	ATL2	0.599603	0.0394188
Q9NX63	8	8	8	Coiled-coil-helix-coiled-coil-helix domain-containing protein 3, mitochondrial	CHCHD3	0.598842	0.0180197
P43304	24	24	24	Glycerol-3-phosphate dehydrogenase, mitochondrial	GPD2	0.59881	0.0224325
Q9Y3D9	5	5	5	28S ribosomal protein S23, mitochondrial	MRPS23	0.596776	0.000645263
P20700	40	40	37	Lamin-B1	LMNB1	0.593274	0.00272907
Q13627	3	3	2	Dual specificity tyrosine-phosphorylation-regulated kinase 1A	DYRK1A	0.592732	0.0420471
Q13610	3	3	3	Periodic tryptophan protein 1 homolog	PWP1	0.5927	0.0484703
Q9NR31	6	6	4	GTP-binding protein SAR1a	SAR1A	0.591743	0.015441
Q96AG4	13	13	13	Leucine-rich repeat-containing protein 59	LRRC59	0.589124	0.0119605
Q9NX14	3	3	3	NADH dehydrogenase [ubiquinone] 1 beta subcomplex subunit 11, mitochondrial	NDUFB11	0.588773	0.0456864
Q9NVI7	19	19	7	ATPase family AAA domain-containing protein 3A	ATAD3A	0.588101	0.000530686
Q9UJS0	14	14	13	Calcium-binding mitochondrial carrier protein Aralar2	SLC25A13	0.587909	0.0180642
P12235	16	3	3	ADP/ATP translocase 1	SLC25A4	0.587557	0.000679579
P48723	8	8	8	Heat shock 70 kDa protein 13	HSPA13	0.586084	0.0159827
Q96EY7	7	7	7	Pentatricopeptide repeat-containing protein 3, mitochondrial	PTCD3	0.582299	0.017247
Q13445	3	3	3	Transmembrane emp24 domain-containing protein 1	TMED1	0.581914	0.0232878
Q5T653	3	3	3	39S ribosomal protein L2, mitochondrial	MRPL2	0.581753	0.0246153
Q96A33	15	15	15	Coiled-coil domain-containing protein 47	CCDC47	0.58156	0.0232496
Q15125	1	1	1	3-beta-hydroxysteroid-Delta(8),Delta(7)-isomerase	EBP	-0.589087	0.0261466
Q9Y5V3	9	8	7	Melanoma-associated antigen D1	MAGED1	-0.596194	0.0141999
Q8IXK0	6	6	5	Polyhomeotic-like protein 2	PHC2	-0.619411	0.0287788
O75165	30	30	30	DnaJ homolog subfamily C member 13	DNAJC13	-0.710874	0.0154448
Q96SZ5	6	6	6	2-aminoethanethiol dioxygenase	ADO	-0.715833	0.044983
Q8N201	10	10	10	Integrator complex subunit 1	INTS1	-0.747108	0.0226651
Q6P4R8	4	4	4	Nuclear factor related to kappa-B-binding protein	NFRKB	-0.749984	0.0316604
Q99496	4	3	3	E3 ubiquitin-protein ligase RING2	RNF2	-0.769297	0.0326445
Q5T9L3	5	5	5	Protein wntless homolog	WLS	-0.785187	0.0497886
P28329	3	3	3	Choline O-acetyltransferase	CHAT	-0.793407	0.0485092
Q86TG7	7	7	7	Retrotransposon-derived protein PEG10	PEG10	-0.802051	0.0498755
Q96EM0	3	3	3	Probable proline racemase	C14orf149	-0.8063	0.0498331
P31350	11	11	8	Ribonucleoside-diphosphate reductase subunit M2	RRM2	-0.84841	0.0389339
Q9P0P0	3	3	3	E3 ubiquitin-protein ligase RNF181	RNF181	-0.85042	0.000564639
O95864	8	8	8	Fatty acid desaturase 2	FADS2	-0.86791	0.0228794
Q15004	6	6	6	PCNA-associated factor	PAF	-0.904881	0.0207961
Q9Y6H1;Q5T1J5	4;3	4;3	4;3	Coiled-coil-helix-coiled-coil-helix domain-containing protein 2, mitochondrial;Putative coiled-coil-helix-coiled-coil-helix domain-containing protein CHCHD2P9, mitochondrial	CHCHD2;CHCHD2P9	-0.943204	0.00499882
Q13243	4	3	3	Serine/arginine-rich splicing factor 5	SRSF5	-1.29423	0.00709295
Q9UBK7;Q9UNT1	2;2	2;2	2;2	Rab-like protein 2A;Rab-like protein 2B	RABL2A;RABL2B	-1.36217	0.00282562
Q9H5Q4	2	2	2	Dimethyladenosine transferase 2, mitochondrial	TFB2M	-2.09737	0.0337541

## Sheet: 2h vs CTL_Phospho
Amino acid	Multiplicity 1	Localization prob 2	-Log t-test p value	Phospho_Log2 2h/CTL (AVERAGE)	Proteins	Positions within proteins 3, 4	Protein names	Gene names	Sequence window
S	___1	1	2.63947	3.03798	P07355;A6NMY6	26;26	Annexin A2;Putative annexin A2-like protein	ANXA2;ANXA2P2	LSLEGDHSTPPSAYGSVKAYTNFDAERDALN
S	___1	0.998564	1.75334	2.3535	P49023	322	Paxillin	PXN	QDEGGFMAQGKTGSSSPPGGPPKPGSQLDSM
S	___1	0.999985	1.98038	2.30285	Q13085	80	Acetyl-CoA carboxylase 1;Biotin carboxylase	ACACA	SSLQDGLALHIRSSMSGLHLVKQGRDRKKID
T	___1	1	1.34471	2.24073	P13639	57	Elongation factor 2	EEF2	KAGIIASARAGETRFTDTRKDEQERCITIKS
S	___1	0.999783	2.33776	1.92026	Q9P246	680	Stromal interaction molecule 2	STIM2	SPASKVYNGILEKSCSMNQLSSGIPVPKPRH
S	___1	0.975902	2.16964	1.65654	O43491	87	Band 4.1-like protein 2	EPB41L2	RGISRFIPPWLKKQKSYTLVVAKDGGDKKEP
S	___1	0.999723	1.85331	1.60458	Q02952	286	A-kinase anchor protein 12	AKAP12	EKQEKEPSKSAESPTSPVTSETGSTFKKFFT
S	___1	0.999826	2.24631	1.54448	P48681	820	Nestin	NES	EFLKSLKEESVEAVKSLETEILESLKSAGQE
S	___1	1	1.96665	1.35443	P46821	1016	Microtubule-associated protein 1B;MAP1 light chain LC1	MAP1B	EEDMDEAIEKGEAEQSEEEADEEDKAEDARE
S	___1	1	2.16148	1.30944	P48681	713	Nestin	NES	EPLRSLEDENKEAFRSLEKENQEPLKTLEEE
S	___1	0.999996	1.30487	1.28572	P06748	70	Nucleophosmin	NPM1	DELHIVEAEAMNYEGSPIKVTLATLKMSVQP
S	___1	0.984729	1.64471	1.2831	P55011	77	Solute carrier family 12 member 2	SLC12A2	AAAGDGLGRPLGPTPSQSRFQVDLVSENAGR
S	___1	1	1.90742	1.26923	Q6DN90	180	IQ motif and SEC7 domain-containing protein 1	IQSEC1	RMSRRIVLSNMRMQFSFEGPEKVHSSYFEGK
S	___1	1	1.98915	1.13798	P46821	832	Microtubule-associated protein 1B;MAP1 light chain LC1	MAP1B	IGPAKELEAERSLMSSPEDLTKDFEELKAEE
S	___1	1	1.96784	0.902661	P24593	116	Insulin-like growth factor-binding protein 5	IGFBP5	LNEKSYREQVKIERDSREHEEPTTSEMAEET
S	___1	0.999993	1.62076	0.855188	P04792	82	Heat shock protein beta-1	HSPB1	AVAAPAYSRALSRQLSSGVSEIRHTADRWRV
S	___1	1	1.52298	0.810702	Q15154	93	Pericentriolar material 1 protein	PCM1	KTPHTFPHSRYMSQMSVPEQAELEKLKQRIN
S	___1	0.999986	2.06314	0.789437	Q13177	141	Serine/threonine-protein kinase PAK 2;PAK-2p27;PAK-2p34	PAK2	VLKFYDSNTVKQKYLSFTPPEKDGFPSGTPA
S	___1	1	1.4471	0.773892	P05388;Q8NHW5	307;307	60S acidic ribosomal protein P0;60S acidic ribosomal protein P0-like	RPLP0;RPLP0P6	AAAPAKVEAKEESEESDEDMGFGLFD_____
S	___2	0.999989	1.34222	0.758095	Q9NTI5	1182	Sister chromatid cohesion protein PDS5 homolog B	PDS5B	PGRIKGRLDSSEMDHSENEDYTMSSPLPGKK
S	___1	1	1.55401	0.75251	Q9BYG3	247	MKI67 FHA domain-interacting nucleolar phosphoprotein	MKI67IP	GPTPVCTPTFLERRKSQVAELNDDDKDDEIV
S	___2	0.999838	1.53229	0.701874	P62995;Q13595	266;262	Transformer-2 protein homolog beta;Transformer-2 protein homolog alpha	TRA2B;TRA2A	RAAQDRDQIYRRRSPSPYYSRGGYRSRSRSR
S	___2	1	1.30636	0.680627	P24593	116	Insulin-like growth factor-binding protein 5	IGFBP5	LNEKSYREQVKIERDSREHEEPTTSEMAEET
S	___2	0.999999	1.75591	0.662144	P62995;Q13595	264;260	Transformer-2 protein homolog beta;Transformer-2 protein homolog alpha	TRA2B;TRA2A	GWRAAQDRDQIYRRRSPSPYYSRGGYRSRSR
S	___1	0.999999	1.84792	0.634136	Q03252;P20700	385;391	Lamin-B2;Lamin-B1	LMNB2;LMNB1	AYRKLLEGEEERLKLSPSPSSRVTVSRATSS
S	___2	0.906036	1.62559	0.61942	P24593	125	Insulin-like growth factor-binding protein 5	IGFBP5	VKIERDSREHEEPTTSEMAEETYSPKIFRPK
S	___1	1	1.35152	0.614739	O76021	361	Ribosomal L1 domain-containing protein 1	RSL1D1	KKRGRGKAQVKATNESEDEIPQLVPIGKKTP
T	___1	0.999681	1.57229	0.612865	P20042	111	Eukaryotic translation initiation factor 2 subunit 2	EIF2S2	EGVKDLKIESDVQEPTEPEDDLDIMLGNKKK
S	___1	0.99275	1.91674	0.610014	Q02952	598	A-kinase anchor protein 12	AKAP12	LAEVQQDGEAEEGATSDGEKKREGVTPWASF
S	___1	1	1.90228	-0.622934	Q15149	125	Plectin	PLEC	ARRTPHVQAVQGPLGSPPKRGPLPTEEQRVY
S	___1	0.988333	1.82105	-0.643056	P27816	825	Microtubule-associated protein 4	MAP4	TTTAAAVASTGPSSRSPSTLLPKKPTAIKTE
S	___1	1	1.40048	-0.648416	P26358	714	DNA (cytosine-5)-methyltransferase 1	DNMT1	ADDDEEVDDNIPEMPSPKKMHQGKKKKQNKN
S	___1	0.999999	2.16514	-0.664493	P18206	721	Vinculin	VCL	VEKMTGLVDEAIDTKSLLDASEEAIKKDLDK
S	___1	1	1.32338	-0.695429	O95394	64	Phosphoacetylglucosamine mutase	PGM3	RSKQTKSTIGVMVTASHNPEEDNGVKLVDPL
S	___1	0.950641	1.44321	-0.742188	Q9Y4F9	573	Protein FAM65B	FAM65B	TSEGNITKQLVKRLTSAEVPMATDRLLSEGS
S	___1	1	2.34273	-0.754126	P27816	636	Microtubule-associated protein 4	MAP4	FMISPETVTGTGKKCSLPAEEDSVLEKLGER
S	___2	1	1.45881	-0.764139	P62753	236	40S ribosomal protein S6	RPS6	KEKRQEQIAKRRRLSSLRASTSKSESSQK__
S	___1	0.999999	1.68275	-0.782009	Q8WWI1	276	LIM domain only protein 7	LMO7	CSSDITLRGGREGFESDTDSEFTFKMQDYNK
S	___1	1	1.42971	-0.799866	Q7Z5L9	175	Interferon regulatory factor 2-binding protein 2	IRF2BP2	NGFSKLEEPPELNRQSPNPRRGHAVPPTLVP
S	___1	1	2.01558	-0.802358	P16949	38	Stathmin	STMN1	ILSPRSKESVPEFPLSPPKKKDLSLEEIQKK
S	___1	0.998094	1.55705	-0.838505	Q01082	2341	Spectrin beta chain, brain 1	SPTBN1	AQTLPTSVVTITSESSPGKREKDKEKDKEKR
T	___1	1	2.94687	-0.844286	Q16181	426	Septin-7	SEPT7	WEAQQRILEQQNSSRTLEKNKKKGKIF____
S	___1	0.957875	3.57319	-0.856002	P08670	459	Vimentin	VIM	IKTVETRDGQVINETSQHHDDLE________
S	___1	0.982563	3.3785	-0.860659	Q13557	330	Calcium/calmodulin-dependent protein kinase type II subunit delta	CAMK2D	SAAKSLLKKPDGVKESTESSNTTIEDEDVKA
S	___1	1	2.47853	-0.891975	Q9NQT8	1644	Kinesin-like protein KIF13B	KIF13B	SPGRERPDLEAPAPGSPFRVRRVRASELRSF
S	___2	0.999251	1.57721	-0.908224	Q6UN15	492	Pre-mRNA 3'-end-processing factor FIP1	FIP1L1	RERERTRERERERDHSPTPSVFNSDEERYRY
S	___2	0.99999	1.57721	-0.908224	Q6UN15	500	Pre-mRNA 3'-end-processing factor FIP1	FIP1L1	RERERDHSPTPSVFNSDEERYRYREYAERGY
S	___1	0.969036	1.57688	-0.91476	P30086	52	Phosphatidylethanolamine-binding protein 1;Hippocampal cholinergic neurostimulating peptide	PEBP1	LGKVLTPTQVKNRPTSISWDGLDSGKLYTLV
S	___1	0.999985	1.92493	-0.955026	P08670	39	Vimentin	VIM	PSSSRSYVTTSTRTYSLGSALRPSTSRSLYA
S	___1	0.983036	1.50709	-0.978693	P08670	56	Vimentin	VIM	GSALRPSTSRSLYASSPGGVYATRSSAVRLR
S	___1	0.931651	1.74221	-0.992142	Q15942	308	Zyxin	ZYX	NQKLGHPEALSAGTGSPQPPSFTYAQQREKP
T	___2	1	1.55524	-1.01383	Q14195	514	Dihydropyrimidinase-related protein 3	DPYSL3	YDGPVFDLTTTPKGGTPAGSARGSPTRPNPP
S	___1	1	1.89	-1.02942	P31350	20	Ribonucleoside-diphosphate reductase subunit M2	RRM2	RVPLAPITDPQQLQLSPLKGLSLVDKENTPP
S	___1	1	1.47062	-1.06176	P27708	1859	CAD protein;Glutamine-dependent carbamoyl-phosphate synthase;Aspartate carbamoyltransferase;Dihydroorotase	CAD	LPDGRFHLPPRIHRASDPGLPAEEPKEKSSR
S	___1	1	1.95722	-1.07252	P22234	27	Multifunctional protein ADE2;Phosphoribosylaminoimidazole-succinocarboxamide synthase;Phosphoribosylaminoimidazole carboxylase	PAICS	KLYEGKTKEVYELLDSPGKVLLQSKDQITAG
S	___1	0.999999	1.88758	-1.09172	Q96B36	183	Proline-rich AKT1 substrate 1	AKT1S1	SVPPASALPTQQYAKSLPVSVPVWGFKEKRT
S	___1	0.998011	1.66696	-1.15263	O60504	530	Vinexin	SORBS3	EPRLRLCDDGPQLPTSPRLTAAARSARHPSS
S	___1	1	1.9601	-1.22534	B5ME19;Q99613	39;39	Eukaryotic translation initiation factor 3 subunit C	EIF3CL;EIF3C	TKPVGGNYGKQPLLLSEDEEDTKRVVRSAKD
S	___1	0.999661	2.47933	-1.23181	Q6PKG0	774	La-related protein 1	LARP1	EPSTIARSLPTTVPESPNYRNTRTPRTPRTP
S	___1	1	1.31964	-1.31727	P08670	42	Vimentin	VIM	SRSYVTTSTRTYSLGSALRPSTSRSLYASSP
S	___1	0.992912	3.05797	-1.32319	Q9UHB6	225	LIM domain and actin-binding protein 1	LIMA1	KILRAQSRSASGRKISENSYSLDDLEIGPGQ
S	___1	0.880922	1.74391	-1.3593	Q6UUV9	151	CREB-regulated transcription coactivator 1	CRTC1	MYLSPPADTSWRRTNSDSALHQSTMTPTQPE
S	___1	0.999111	2.21016	-1.47889	P85037	420	Forkhead box protein K1	FOXK1	FRTPFGPLSSRSAPASPTHPGLMSPRSGGLQ
S	___1	0.99999	1.76192	-1.48849	P46821	1501	Microtubule-associated protein 1B;MAP1 light chain LC1	MAP1B	SQPALALDERKLGDVSPTQIDVSQFGSFKED
S	___1	1	1.70413	-1.56681	Q13586	575	Stromal interaction molecule 1	STIM1	IEGVHPGSLVEKLPDSPALAKKALLALNHGL
S	___1	0.999877	1.73657	-1.63299	O00193	17	Small acidic protein	SMAP	SAARESHPHGVKRSASPDDDLGSSNWEAADL
T	___2	0.999792	2.23678	-1.81259	Q14195	509	Dihydropyrimidinase-related protein 3	DPYSL3	VPRGMYDGPVFDLTTTPKGGTPAGSARGSPT
T	___1	0.930646	1.36284	-2.20488	P46821	1067	Microtubule-associated protein 1B;MAP1 light chain LC1	MAP1B	AAEAGGAEEQYGFLTTPTKQLGAQSPGREPA
1 Number of phosphosites within the phosphopeptide
2 Probability of phosphosite assignment within the phosphopeptide (only phosphosites with a localization probability > 0,75 are considered and reported)
3 Position of the phosphosite within the protein
4 The phosphosite is labeled green, red or orange if the it is implicated in the activation, deactivation or other functions of the protein, respectively. The information is retrieved from Phosphositeplus (http://www.phosphosite.org/homeAction.do;jsessionid=14FE1B22B7BDF1FD3A29ED9D6F3BD848)

## Sheet: 6h vs CTL_Phospho
Amino acid	Multiplicity 1	Localization prob 2	Position	-Log t-test p value	Phospho_Log2 6h/CTL (AVERAGE)	Proteins	Positions within proteins 3, 4	Protein names	Gene names	Sequence window
S	___1	0.935047	66	1.99805	4.61474	P08670	66	Vimentin	VIM	SLYASSPGGVYATRSSAVRLRSSVPGVRLLQ
T	___1	1	57	2.12907	3.15734	P13639	57	Elongation factor 2	EEF2	KAGIIASARAGETRFTDTRKDEQERCITIKS
S	___1	0.999474	49	2.37384	2.68146	P08670	49	Vimentin	VIM	STRTYSLGSALRPSTSRSLYASSPGGVYATR
S	___1	0.999783	680	2.03787	2.63067	Q9P246	680	Stromal interaction molecule 2	STIM2	SPASKVYNGILEKSCSMNQLSSGIPVPKPRH
S	___1	0.999985	80	2.01564	2.59824	Q13085	80	Acetyl-CoA carboxylase 1;Biotin carboxylase	ACACA	SSLQDGLALHIRSSMSGLHLVKQGRDRKKID
S	___1	0.968968	928	1.89103	2.45317	P27816	928	Microtubule-associated protein 4	MAP4	PSSTTPRLSRLATNTSAPDLKNVRSKVGSTE
S	___1	1	166	3.28773	2.35454	O43399	166	Tumor protein D54	TPD52L2	ISRKLGDMRNSATFKSFEDRVGTIKSKVVGD
S	___1	0.984729	77	2.33409	2.30053	P55011	77	Solute carrier family 12 member 2	SLC12A2	AAAGDGLGRPLGPTPSQSRFQVDLVSENAGR
S	___1	0.999999	137	1.33906	1.86452	O75396	137	Vesicle-trafficking protein SEC22b	SEC22B	TKKLYIDSCARRNLGSINTELQDVQRIMVAN
S	___1	1	116	1.46893	1.79832	P24593	116	Insulin-like growth factor-binding protein 5	IGFBP5	LNEKSYREQVKIERDSREHEEPTTSEMAEET
S	___1	1	430	1.59794	1.65976	P08670	430	Vimentin	VIM	LPNFSSLNLRETNLDSLPLVDTHSKRTLLIK
T	___1	0.997462	541	1.48839	1.59837	Q13263	541	Transcription intermediary factor 1-beta	TRIM28	AAAAATGQPGTAPAGTPGAPPLAGMAIVKEE
S	___1	0.979813	72	2.85305	1.56752	P08670	72	Vimentin	VIM	PGGVYATRSSAVRLRSSVPGVRLLQDSVDFS
S	___1	1	473	1.59171	1.52058	Q13263	473	Transcription intermediary factor 1-beta	TRIM28	YSSAEPHVSGVKRSRSGEGEVSGLMRKVPRV
S	___1	1	564	2.34167	1.39966	P27824	564	Calnexin	CANX	EEKQKSDAEEDGGTVSQEEEDRKPKAEEDEI
S	___1	0.997911	24	1.95204	1.31137	Q96A57	24	Transmembrane protein 230	TMEM230	ATGIPSSKVKYSRLSSTDDGYIDLQFKKTPP
S	___1	0.999826	820	2.92853	1.25093	P48681	820	Nestin	NES	EFLKSLKEESVEAVKSLETEILESLKSAGQE
S	___1	0.975902	87	1.75233	1.18823	O43491	87	Band 4.1-like protein 2	EPB41L2	RGISRFIPPWLKKQKSYTLVVAKDGGDKKEP
S	___1	0.977023	47	2.19556	1.18365	P08670	47	Vimentin	VIM	TTSTRTYSLGSALRPSTSRSLYASSPGGVYA
S	___1	1	832	1.62656	1.13516	P46821	832	Microtubule-associated protein 1B;MAP1 light chain LC1	MAP1B	IGPAKELEAERSLMSSPEDLTKDFEELKAEE
S	___1	0.999996	316	3.51621	1.11386	Q9UGP4	316	LIM domain-containing protein 1	LIMD1	LALSCPRQGGLPRSNSGLGGEVSGVMSKPNV
S	___1	1	713	2.00955	1.09701	P48681	713	Nestin	NES	EPLRSLEDENKEAFRSLEKENQEPLKTLEEE
S	___1	0.999999	438	2.38353	1.00921	P08670	438	Vimentin	VIM	LRETNLDSLPLVDTHSKRTLLIKTVETRDGQ
S	___1	1	247	1.57859	1.00547	Q9BYG3	247	MKI67 FHA domain-interacting nucleolar phosphoprotein	MKI67IP	GPTPVCTPTFLERRKSQVAELNDDDKDDEIV
S	___1	0.99935	1405	2.60007	0.98361	Q13459	1405	Unconventional myosin-IXb	MYO9B	KKKPGDASSLPDAGLSPGSQVDSKSTFKRLF
T	___1	0.9994	201	1.6555	0.930934	P62995	201	Transformer-2 protein homolog beta	TRA2B	GRRIRVDFSITKRPHTPTPGIYMGRPTYGSS
S	___1	0.999723	286	1.54717	0.922139	Q02952	286	A-kinase anchor protein 12	AKAP12	EKQEKEPSKSAESPTSPVTSETGSTFKKFFT
S	___1	0.999993	82	3.07974	0.896025	P04792	82	Heat shock protein beta-1	HSPB1	AVAAPAYSRALSRQLSSGVSEIRHTADRWRV
S	___1	1	270	1.73621	0.874819	Q9H3N1	270	Thioredoxin-related transmembrane protein 1	TMX1	EGTNKDFPQNAIRQRSLGPSLATDKS_____
S	___1	0.999874	57	1.45533	0.864895	O00264	57	Membrane-associated progesterone receptor component 1	PGRMC1	LYKIVRGDQPAASGDSDDDEPPPLPRLKRRD
S	___1	0.999226	144	1.6932	0.816512	P84157	144	Matrix-remodeling-associated protein 7	MXRA7	EGPEEEDGEGFSFKYSPGKLRGNQYKKMMTK
S	___1	1	2272	2.49703	0.802753	Q9UQ35	2272	Serine/arginine repetitive matrix protein 2	SRRM2	ADSRTPAAAAAMNLASPRTAVAPSAVNLADP
S	___2	1	80	1.61064	0.79258	Q15637	80	Splicing factor 1	SF1	LRTGDLGIPPNPEDRSPSPEPIYNSEGKRLN
S	___2	0.99999	82	1.61064	0.79258	Q15637	82	Splicing factor 1	SF1	TGDLGIPPNPEDRSPSPEPIYNSEGKRLNTR
S	___1	0.892556	370	1.44285	0.757085	Q9BXK5	370	Bcl-2-like protein 13	BCL2L13	LGTREPDTEVITVEKSSPATSLFVELDEEEV
S	___2	0.999989	1182	2.07076	0.749289	Q9NTI5	1182	Sister chromatid cohesion protein PDS5 homolog B	PDS5B	PGRIKGRLDSSEMDHSENEDYTMSSPLPGKK
S	___1	1	104	1.35903	0.747296	Q15121	104	Astrocytic phosphoprotein PEA-15	PEA15	ISEEDELDTKLTRIPSAKKYKDIIRQPSEEE
S	___1	1	320	1.54211	0.712792	P08621	320	U1 small nuclear ribonucleoprotein 70 kDa	SNRNP70	RKEELRGGGGDMAEPSEAGDAPPDDGPPGEL
S	___1	0.999064	115	1.39337	0.709434	P18615	115	Negative elongation factor E	RDBP	EKGPVPTFQPFQRSISADDDLQESSRRPQRK
S	___1	0.999996	710	1.46146	0.693702	Q9UKV3	710	Apoptotic chromatin condensation inducer in the nucleus	ACIN1	ERTSTSSSSVQARRLSQPESAEKHVTQRLQP
S	___1	0.998628	741	1.98879	0.692024	Q6IN85	741	Serine/threonine-protein phosphatase 4 regulatory subunit 3A	SMEK1	EEKEVLLKTNLSGRQSPSFKLSLSSGTKTNL
S	___2	1	243	1.32095	0.691292	Q9Y2W1	243	Thyroid hormone receptor-associated protein 3	THRAP3	YGTGSASRASAVSELSPRERSPALKSPLQSV
S	___2	1	248	1.32095	0.691292	Q9Y2W1	248	Thyroid hormone receptor-associated protein 3	THRAP3	ASRASAVSELSPRERSPALKSPLQSVVVRRR
S	___1	1	1443	2.10737	0.686737	P46821	1443	Microtubule-associated protein 1B;MAP1 light chain LC1	MAP1B	PFEEKSGKQGSPDQVSPVSEMTSTSLYQDKQ
T	___1	0.999995	211	2.42556	0.686036	O15173	211	Membrane-associated progesterone receptor component 2	PGRMC2	YVGRLLKPGEEPSEYTDEEDTKDHNKQD___
S	___1	1	48	2.14642	0.684066	P62805	48	Histone H4	HIST1H4A	PAIRRLARRGGVKRISGLIYEETRGVLKVFL
S	___1	1	181	2.13791	0.659037	O00264	181	Membrane-associated progesterone receptor component 1	PGRMC1	HVGKLLKEGEEPTVYSDEEEPKDESARKND_
S	___1	0.999379	1493	2.79273	0.639976	Q8WWI1	1493	LIM domain only protein 7	LMO7	TPLHNDNSWIRQRSASVNKEPVSLPGIMRRG
S	___1	1	1510	2.42726	0.632476	Q8WWI1	1510	LIM domain only protein 7	LMO7	NKEPVSLPGIMRRGESLDNLDSPRSNSWRQP
S	___2	0.999999	264	1.38679	0.615222	P62995;Q13595	264;260	Transformer-2 protein homolog beta;Transformer-2 protein homolog alpha	TRA2B;TRA2A	GWRAAQDRDQIYRRRSPSPYYSRGGYRSRSR
S	___1	1	180	1.44254	0.60462	Q6DN90	180	IQ motif and SEC7 domain-containing protein 1	IQSEC1	RMSRRIVLSNMRMQFSFEGPEKVHSSYFEGK
S	___1	1	1905	1.94297	0.600191	O15027	1905	Protein transport protein Sec16A	SEC16A	WDRADSGPTQPPLSLSPAPETKRPGQAAKKE
S	___1	0.995888	307	1.72178	-0.582258	Q15054	307	DNA polymerase delta subunit 3	POLD3	KVLQKEKKRGKRVALSDDETKETENMRKKRR
S	___1	1	1411	1.93817	-0.582517	P49815	1411	Tuberin	TSC2	DILGDPGDKADVGRLSPEVKARSQSGTLDGE
S	___2	0.999929	471	1.73274	-0.594091	P48681	471	Nestin	NES	TGQSPEDHASLAPPLSPDHSSLEAKDGESGG
S	___1	0.99997	1915	1.47296	-0.595831	P46821	1915	Microtubule-associated protein 1B;MAP1 light chain LC1	MAP1B	DVGGYYYEKIERTTKSPSDSGYSYETIGKTT
S	___2	1	1653	1.38764	-0.606049	P11137	1653	Microtubule-associated protein 2	MAP2	VPSEKKVAIIRTPPKSPATPKQLRLINQPLP
S	___1	0.969923	579	2.03569	-0.612479	Q86W92	579	Liprin-beta-1	PPFIBP1	PKDSQRNSPFQIPPPSPDSKKKSRGIMKLFG
S	___1	1	181	1.8569	-0.631722	O96013	181	Serine/threonine-protein kinase PAK 4	PAK4	GSGGPQESSRDKRPLSGPDVGTPQPAGLASG
S	___1	0.995974	504	1.72058	-0.672816	Q14160	504	Protein scribble homolog	SCRIB	EGRRSEACPCQPDSGSPLPAEEEKRLSAESG
S	___1	0.999914	1448	2.34179	-0.673529	Q14160	1448	Protein scribble homolog	SCRIB	PPWASPSPTSRQSPASPPPLGGGAPVRTAKA
S	___1	0.940215	20	2.10366	-0.681959	O14950;P24844;P19105	20;20;19	Myosin regulatory light chain 12B;Myosin regulatory light polypeptide 9;Myosin regulatory light chain 12A	MYL12B;MYL9;MYL12A	KAKTKTTKKRPQRATSNVFAMFDQSQIQEFK
S	___1	1	113	1.37081	-0.686783	Q15185	113	Prostaglandin E synthase 3	PTGES3	WLSVDFNNWKDWEDDSDEDMSNFDRFSEMMN
S	___1	1	680	2.03745	-0.690401	P48681	680	Nestin	NES	ESLTALEKENQEPLRSPEVGDEEALRPLTKE
S	___1	1	967	1.42229	-0.693792	Q9UP95	967	Solute carrier family 12 member 4	SLC12A4	LVKDRHSALRLESLYSDEEDESAVGADKIQM
S	___1	1	1231	3.07783	-0.711151	Q04637	1231	Eukaryotic translation initiation factor 4 gamma 1	EIF4G1	RGRDAVKREAALPPVSPLKAALSEEELEKKS
S	___1	1	101	1.58046	-0.716333	P29966	101	Myristoylated alanine-rich C-kinase substrate	MARCKS	EKGEPAAAAAPEAGASPVEKEAPAEGEAAEP
S	___1	1	20	2.30255	-0.755435	P31350	20	Ribonucleoside-diphosphate reductase subunit M2	RRM2	RVPLAPITDPQQLQLSPLKGLSLVDKENTPP
S	___1	1	108	1.46209	-0.759287	Q5JVS0	108	Intracellular hyaluronan-binding protein 4	HABP4	KERKSLPAPVAQRPDSPGGGLQAPGQKRTPR
S	___1	0.957875	459	1.63097	-0.784207	P08670	459	Vimentin	VIM	IKTVETRDGQVINETSQHHDDLE________
S	___1	0.999887	281	1.36795	-0.789446	Q15942	281	Zyxin	ZYX	FSPVTPKFTPVASKFSPGAPGGSGSQPNQKL
S	___3	1	30	1.37183	-0.804562	Q9Y2V2	30	Calcium-regulated heat stable protein 1	CARHSP1	QASVGLLDTPRSRERSPSPLRGNVVPSPLPT
S	___3	1	32	1.37183	-0.804562	Q9Y2V2	32	Calcium-regulated heat stable protein 1	CARHSP1	SVGLLDTPRSRERSPSPLRGNVVPSPLPTRR
S	___3	0.999972	41	1.37183	-0.804562	Q9Y2V2	41	Calcium-regulated heat stable protein 1	CARHSP1	SRERSPSPLRGNVVPSPLPTRRTRTFSATVR
S	___1	0.952809	872	1.97215	-0.825072	Q9C0C2	872	182 kDa tankyrase-1-binding protein	TNKS1BP1	SRDAELQDQEFGKRDSLGTYSSRDVSLGDWE
S	___2	1	1389	1.53887	-0.831353	P46821	1389	Microtubule-associated protein 1B;MAP1 light chain LC1	MAP1B	RASVSPMDEPVPDSESPIEKVLSPLRSPPLI
S	___1	0.999957	371	1.81969	-0.841759	Q02952	371	A-kinase anchor protein 12	AKAP12	AHPQEPAESAHEPRLSAEYEKVELPSEEQVS
T	___2	1	514	2.08038	-0.869333	Q14195	514	Dihydropyrimidinase-related protein 3	DPYSL3	YDGPVFDLTTTPKGGTPAGSARGSPTRPNPP
S	___2	0.999849	1378	1.32305	-0.885755	P46821	1378	Microtubule-associated protein 1B;MAP1 light chain LC1	MAP1B	FEFSDAKDENERASVSPMDEPVPDSESPIEK
S	___1	1	333	1.32093	-0.893174	Q641Q2;Q9Y4E1	333;333	WASH complex subunit FAM21A;WASH complex subunit FAM21C	FAM21A;FAM21C	KPRKTLKEKKERRTPSDDEEDNLFAPPKLTD
S	___1	1	578	2.02765	-0.914245	Q8N3F8	578	MICAL-like protein 1	MICALL1	SGELVEPRVEQMPQASPGLAPRTRGSSGPQP
S	___1	0.998011	530	1.51217	-0.922612	O60504	530	Vinexin	SORBS3	EPRLRLCDDGPQLPTSPRLTAAARSARHPSS
S	___1	1	1859	2.17689	-0.944996	P27708	1859	CAD protein;Glutamine-dependent carbamoyl-phosphate synthase;Aspartate carbamoyltransferase;Dihydroorotase	CAD	LPDGRFHLPPRIHRASDPGLPAEEPKEKSSR
S	___1	0.9984	226	2.43962	-0.985188	Q9NY27	226	Serine/threonine-protein phosphatase 4 regulatory subunit 2	PPP4R2	NHSDSSTSESEVSSVSPLKNKHPDEDAVEAE
S	___1	0.999276	100	1.36678	-0.995777	P23193	100	Transcription elongation factor A protein 1	TCEA1	DLDEKKKEPAITSQNSPEAREESTSSGNVSN
S	___2	0.999218	459	1.67127	-1.00986	P48681	459	Nestin	NES	PEEPGGQRQEASTGQSPEDHASLAPPLSPDH
S	___1	1	91	2.26419	-1.01515	O94826	91	Mitochondrial import receptor subunit TOM70	TOMM70A	GLKRNSERKTPEGRASPAPGSGHPEGPGAHL
S	___1	0.982563	330	2.97692	-1.03911	Q13557	330	Calcium/calmodulin-dependent protein kinase type II subunit delta	CAMK2D	SAAKSLLKKPDGVKESTESSNTTIEDEDVKA
S	___2	0.999999	385	1.52286	-1.07626	Q03252;P20700	385;391	Lamin-B2;Lamin-B1	LMNB2;LMNB1	AYRKLLEGEEERLKLSPSPSSRVTVSRATSS
S	___2	0.999739	387	1.52286	-1.07626	Q03252;P20700	387;393	Lamin-B2;Lamin-B1	LMNB2;LMNB1	RKLLEGEEERLKLSPSPSSRVTVSRATSSSS
S	___1	1	27	2.92628	-1.08804	P22234	27	Multifunctional protein ADE2;Phosphoribosylaminoimidazole-succinocarboxamide synthase;Phosphoribosylaminoimidazole carboxylase	PAICS	KLYEGKTKEVYELLDSPGKVLLQSKDQITAG
S	___1	0.999661	774	2.39946	-1.10343	Q6PKG0	774	La-related protein 1	LARP1	EPSTIARSLPTTVPESPNYRNTRTPRTPRTP
S	___2	0.995887	450	2.50242	-1.11941	O94804	450	Serine/threonine-protein kinase 10	STK10	GDLSPAANRSQKASQSRPNSSALETLGGEKL
S	___1	0.931651	308	2.29802	-1.12481	Q15942	308	Zyxin	ZYX	NQKLGHPEALSAGTGSPQPPSFTYAQQREKP
S	___2	0.971847	454	3.25329	-1.16817	O94804	454	Serine/threonine-protein kinase 10	STK10	PAANRSQKASQSRPNSSALETLGGEKLANGS
S	___1	0.921737	621	1.53545	-1.16837	Q8N3F8	621	MICAL-like protein 1	MICALL1	LLVGDRSPVPSPGSSSPQLQVKSSCKENPFN
S	___1	0.999299	208	1.61597	-1.18424	Q53EP0	208	Fibronectin type III domain-containing protein 3B	FNDC3B	KKLKDRQIDRQNRLNSPPSSIYKSSCTTVYN
S	___1	1	636	3.24384	-1.21297	P27816	636	Microtubule-associated protein 4	MAP4	FMISPETVTGTGKKCSLPAEEDSVLEKLGER
S	___1	0.999972	41	2.36149	-1.23676	Q9Y2V2	41	Calcium-regulated heat stable protein 1	CARHSP1	SRERSPSPLRGNVVPSPLPTRRTRTFSATVR
T	___1	1	426	2.06724	-1.31605	Q16181	426	Septin-7	SEPT7	WEAQQRILEQQNSSRTLEKNKKKGKIF____
S	___1	0.992912	225	2.2853	-1.33644	Q9UHB6	225	LIM domain and actin-binding protein 1	LIMA1	KILRAQSRSASGRKISENSYSLDDLEIGPGQ
S	___1	0.999728	303	1.7513	-1.3457	Q13247	303	Serine/arginine-rich splicing factor 6	SRSF6	DIKSKSRSRSQSRSNSPLPVPPSKARSVSPP
S	___2	1	240	1.98686	-1.38912	Q8IWW6	240	Rho GTPase-activating protein 12	ARHGAP12	EQIRATTPPNQGRPDSPVYANLQELKISQSA
T	___2	0.978429	231	1.98686	-1.38912	Q8IWW6	231	Rho GTPase-activating protein 12	ARHGAP12	GDELSSSSTEQIRATTPPNQGRPDSPVYANL
S	___1	0.998006	112	1.73279	-1.40485	P50479	112	PDZ and LIM domain protein 4	PDLIM4	AQAHRIHIDPEIQDGSPTTSRRPSGTGTGPE
S	___1	0.999994	612	1.89171	-1.46068	Q02952	612	A-kinase anchor protein 12	AKAP12	TSDGEKKREGVTPWASFKKMVTPKKRVRRPS
S	___1	1	575	1.7757	-1.53486	Q13586	575	Stromal interaction molecule 1	STIM1	IEGVHPGSLVEKLPDSPALAKKALLALNHGL
S	___1	0.98481	461	1.76267	-1.53783	Q86UU1	461	Pleckstrin homology-like domain family B member 1	PHLDB1	LGRRGLDSMRELPPLSPSLSRRALSPLPTRT
T	___2	0.999792	509	1.85113	-1.72332	Q14195	509	Dihydropyrimidinase-related protein 3	DPYSL3	VPRGMYDGPVFDLTTTPKGGTPAGSARGSPT
T	___1	0.999998	508	2.04547	-1.92558	P78344	508	Eukaryotic translation initiation factor 4 gamma 2	EIF4G2	QITMIPPSAQPPRTQTPPLGQTPQLGLKTNP
S	___1	1	1644	1.55239	-2.14568	Q9NQT8	1644	Kinesin-like protein KIF13B	KIF13B	SPGRERPDLEAPAPGSPFRVRRVRASELRSF
T	___1	0.930646	1067	1.40637	-2.42188	P46821	1067	Microtubule-associated protein 1B;MAP1 light chain LC1	MAP1B	AAEAGGAEEQYGFLTTPTKQLGAQSPGREPA
1 Number of phosphosites within the phosphopeptide
2 Probability of phosphosite assignment within the phosphopeptide (only phosphosites with a localization probability > 0,75 are considered and reported)
3 Position of the phosphosite within the protein
4 The phosphosite is labeled green, red or orange if the it is implicated in the activation, deactivation or other functions of the protein, respectively. The information is retrieved from Phosphositeplus (http://www.phosphosite.org/homeAction.do;jsessionid=14FE1B22B7BDF1FD3A29ED9D6F3BD848)
