# Supplementary material for: Membrane-Depolarizing Channel Blockers Induce Selective Glioma Cell Death by Impairing Nutrient Transport and Unfolded Protein/Amino Acid Responses
Source: Oxford University Press journal article supplement (doi:10.1158/0008-5472.can-16-2274), 2017-01-13
Supplement: 00085472can162274-sup-170030_1_supp_3736055_8gdlth.xlsx [file 00085472can162274-sup-170030_1_supp_3736055_8gdlth.xlsx]

## Sheet: GliNS1 DMSO vs Niguldipine.txt
id	Gene	baseMean	baseMean DMSO	baseMean Niguldipine	foldChange	log2FoldChange	pval	padj
8	A2MP1	0	0	0	NA	NA	NA	NA
11	AA06	0	0	0	NA	NA	NA	NA
15	AACSP1	0	0	0	NA	NA	NA	NA
16	AADAC	0	0	0	NA	NA	NA	NA
17	AADACL2	0	0	0	NA	NA	NA	NA
18	AADACL3	0	0	0	NA	NA	NA	NA
19	AADACL4	0	0	0	NA	NA	NA	NA
33	AATK-AS1	0	0	0	NA	NA	NA	NA
62	ABCC13	0	0	0	NA	NA	NA	NA
83	ABCG5	0	0	0	NA	NA	NA	NA
106	ABI3	0	0	0	NA	NA	NA	NA
113	ABO	0	0	0	NA	NA	NA	NA
116	ABRA	0	0	0	NA	NA	NA	NA
148	ACCN5	0	0	0	NA	NA	NA	NA
154	ACER1	0	0	0	NA	NA	NA	NA
177	ACOXL	0	0	0	NA	NA	NA	NA
199	ACSM2A	0	0	0	NA	NA	NA	NA
200	ACSM2B	0	0	0	NA	NA	NA	NA
202	ACSM4	0	0	0	NA	NA	NA	NA
210	ACTBL2	0	0	0	NA	NA	NA	NA
217	ACTL7A	0	0	0	NA	NA	NA	NA
218	ACTL7B	0	0	0	NA	NA	NA	NA
220	ACTL9	0	0	0	NA	NA	NA	NA
237	ACTRT1	0	0	0	NA	NA	NA	NA
238	ACTRT2	0	0	0	NA	NA	NA	NA
246	ACY3	0	0	0	NA	NA	NA	NA
250	ADAD1	0	0	0	NA	NA	NA	NA
251	ADAD2	0	0	0	NA	NA	NA	NA
261	ADAM2	0	0	0	NA	NA	NA	NA
269	ADAM30	0	0	0	NA	NA	NA	NA
274	ADAM6	0	0	0	NA	NA	NA	NA
275	ADAM7	0	0	0	NA	NA	NA	NA
278	ADAMDEC1	0	0	0	NA	NA	NA	NA
329	ADCYAP1	0	0	0	NA	NA	NA	NA
335	ADH1B	0	0	0	NA	NA	NA	NA
337	ADH4	0	0	0	NA	NA	NA	NA
366	ADRA2C	0	0	0	NA	NA	NA	NA
369	ADRB3	0	0	0	NA	NA	NA	NA
390	AFM	0	0	0	NA	NA	NA	NA
392	AFP	0	0	0	NA	NA	NA	NA
429	AGR2	0	0	0	NA	NA	NA	NA
430	AGR3	0	0	0	NA	NA	NA	NA
439	AGTR2	0	0	0	NA	NA	NA	NA
443	AGXT2L1	0	0	0	NA	NA	NA	NA
459	AICDA	0	0	0	NA	NA	NA	NA
461	AIF1_loc5	0	0	0	NA	NA	NA	NA
475	AJAP1	0	0	0	NA	NA	NA	NA
494	AKAP4	0	0	0	NA	NA	NA	NA
516	AKR1CL1	0	0	0	NA	NA	NA	NA
591	ALPI	0	0	0	NA	NA	NA	NA
600	ALS2CR11	0	0	0	NA	NA	NA	NA
614	AMELX	0	0	0	NA	NA	NA	NA
618	AMHR2	0	0	0	NA	NA	NA	NA
619	AMICA1	0	0	0	NA	NA	NA	NA
635	AMTN	0	0	0	NA	NA	NA	NA
664	ANGPT4	0	0	0	NA	NA	NA	NA
667	ANGPTL3	0	0	0	NA	NA	NA	NA
669	ANGPTL5	0	0	0	NA	NA	NA	NA
715	ANKRD22	0	0	0	NA	NA	NA	NA
724	ANKRD30A	0	0	0	NA	NA	NA	NA
726	ANKRD30BL	0	0	0	NA	NA	NA	NA
730	ANKRD33	0	0	0	NA	NA	NA	NA
733	ANKRD34B	0	0	0	NA	NA	NA	NA
734	ANKRD34C	0	0	0	NA	NA	NA	NA
763	ANKS4B	0	0	0	NA	NA	NA	NA
788	ANTXRL	0	0	0	NA	NA	NA	NA
790	ANXA10	0	0	0	NA	NA	NA	NA
813	AOX2P	0	0	0	NA	NA	NA	NA
816	AP1B1P1	0	0	0	NA	NA	NA	NA
845	APBB1IP	0	0	0	NA	NA	NA	NA
852	APCS	0	0	0	NA	NA	NA	NA
869	APOA2	0	0	0	NA	NA	NA	NA
870	APOA4	0	0	0	NA	NA	NA	NA
871	APOA5	0	0	0	NA	NA	NA	NA
872	APOB	0	0	0	NA	NA	NA	NA
873	APOBEC1	0	0	0	NA	NA	NA	NA
882	APOBEC4	0	0	0	NA	NA	NA	NA
888	APOC4	0	0	0	NA	NA	NA	NA
892	APOF	0	0	0	NA	NA	NA	NA
893	APOH	0	0	0	NA	NA	NA	NA
914	AQP12A	0	0	0	NA	NA	NA	NA
915	AQP12B	0	0	0	NA	NA	NA	NA
916	AQP2	0	0	0	NA	NA	NA	NA
925	AQP9	0	0	0	NA	NA	NA	NA
935	AREG_loc1	0	0	0	NA	NA	NA	NA
936	AREG_loc2	0	0	0	NA	NA	NA	NA
972	ARHGAP27_loc2	0	0	0	NA	NA	NA	NA
1011	ARHGEF35	0	0	0	NA	NA	NA	NA
1016	ARHGEF5	0	0	0	NA	NA	NA	NA
1034	ARL11	0	0	0	NA	NA	NA	NA
1052	ARL5C	0	0	0	NA	NA	NA	NA
1102	ARRDC5	0	0	0	NA	NA	NA	NA
1113	ART1	0	0	0	NA	NA	NA	NA
1116	ART5	0	0	0	NA	NA	NA	NA
1126	ASAP1-IT1	0	0	0	NA	NA	NA	NA
1130	ASB10	0	0	0	NA	NA	NA	NA
1132	ASB12	0	0	0	NA	NA	NA	NA
1135	ASB15	0	0	0	NA	NA	NA	NA
1137	ASB17	0	0	0	NA	NA	NA	NA
1138	ASB18	0	0	0	NA	NA	NA	NA
1152	ASCL2	0	0	0	NA	NA	NA	NA
1153	ASCL3	0	0	0	NA	NA	NA	NA
1154	ASCL4	0	0	0	NA	NA	NA	NA
1158	ASGR2	0	0	0	NA	NA	NA	NA
1174	ASPG	0	0	0	NA	NA	NA	NA
1192	ASZ1	0	0	0	NA	NA	NA	NA
1212	ATF7IP2	0	0	0	NA	NA	NA	NA
1238	ATOH1	0	0	0	NA	NA	NA	NA
1273	ATP4B	0	0	0	NA	NA	NA	NA
1319	ATP6V1G3	0	0	0	NA	NA	NA	NA
1333	ATPAF1-AS1	0	0	0	NA	NA	NA	NA
1355	ATXN8OS	0	0	0	NA	NA	NA	NA
1367	AVP	0	0	0	NA	NA	NA	NA
1372	AWAT1	0	0	0	NA	NA	NA	NA
1383	AZU1	0	0	0	NA	NA	NA	NA
1407	B4GALNT2	0	0	0	NA	NA	NA	NA
1457	BARHL1	0	0	0	NA	NA	NA	NA
1458	BARHL2	0	0	0	NA	NA	NA	NA
1462	BASP1P1	0	0	0	NA	NA	NA	NA
1463	BATF	0	0	0	NA	NA	NA	NA
1534	BCYRN1	0	0	0	NA	NA	NA	NA
1538	BDKRB1	0	0	0	NA	NA	NA	NA
1546	BEND2	0	0	0	NA	NA	NA	NA
1548	BEND4	0	0	0	NA	NA	NA	NA
1558	BET3L	0	0	0	NA	NA	NA	NA
1569	BHLHA9	0	0	0	NA	NA	NA	NA
1572	BHLHE23	0	0	0	NA	NA	NA	NA
1576	BHMT2	0	0	0	NA	NA	NA	NA
1590	BIRC8	0	0	0	NA	NA	NA	NA
1596	BLK	0	0	0	NA	NA	NA	NA
1610	BMP10	0	0	0	NA	NA	NA	NA
1611	BMP15	0	0	0	NA	NA	NA	NA
1655	BPESC1	0	0	0	NA	NA	NA	NA
1659	BPIFA1	0	0	0	NA	NA	NA	NA
1660	BPIFA2	0	0	0	NA	NA	NA	NA
1661	BPIFA3	0	0	0	NA	NA	NA	NA
1662	BPIFA4P	0	0	0	NA	NA	NA	NA
1663	BPIFB1	0	0	0	NA	NA	NA	NA
1665	BPIFB3	0	0	0	NA	NA	NA	NA
1671	BPY2_loc1	0	0	0	NA	NA	NA	NA
1672	BPY2_loc2	0	0	0	NA	NA	NA	NA
1673	BPY2_loc3	0	0	0	NA	NA	NA	NA
1674	BPY2B_loc1	0	0	0	NA	NA	NA	NA
1675	BPY2B_loc2	0	0	0	NA	NA	NA	NA
1676	BPY2B_loc3	0	0	0	NA	NA	NA	NA
1677	BPY2C_loc1	0	0	0	NA	NA	NA	NA
1678	BPY2C_loc2	0	0	0	NA	NA	NA	NA
1679	BPY2C_loc3	0	0	0	NA	NA	NA	NA
1694	BRDT	0	0	0	NA	NA	NA	NA
1711	BRS3	0	0	0	NA	NA	NA	NA
1722	BSND	0	0	0	NA	NA	NA	NA
1723	BSPH1	0	0	0	NA	NA	NA	NA
1727	BSX	0	0	0	NA	NA	NA	NA
1742	BTC	0	0	0	NA	NA	NA	NA
1760	BTNL2_loc3	0	0	0	NA	NA	NA	NA
1762	BTNL8	0	0	0	NA	NA	NA	NA
1763	BTNL9	0	0	0	NA	NA	NA	NA
1787	C10orf120	0	0	0	NA	NA	NA	NA
1788	C10orf122	0	0	0	NA	NA	NA	NA
1790	C10orf128	0	0	0	NA	NA	NA	NA
1793	C10orf136	0	0	0	NA	NA	NA	NA
1799	C10orf27	0	0	0	NA	NA	NA	NA
1804	C10orf40	0	0	0	NA	NA	NA	NA
1807	C10orf53	0	0	0	NA	NA	NA	NA
1820	C10orf91	0	0	0	NA	NA	NA	NA
1822	C10orf96	0	0	0	NA	NA	NA	NA
1835	C11orf36	0	0	0	NA	NA	NA	NA
1836	C11orf40	0	0	0	NA	NA	NA	NA
1845	C11orf53	0	0	0	NA	NA	NA	NA
1875	C12orf12	0	0	0	NA	NA	NA	NA
1885	C12orf37	0	0	0	NA	NA	NA	NA
1888	C12orf40	0	0	0	NA	NA	NA	NA
1900	C12orf54	0	0	0	NA	NA	NA	NA
1903	C12orf59	0	0	0	NA	NA	NA	NA
1912	C12orf71	0	0	0	NA	NA	NA	NA
1914	C12orf74	0	0	0	NA	NA	NA	NA
1922	C13orf30	0	0	0	NA	NA	NA	NA
1941	C14orf165	0	0	0	NA	NA	NA	NA
1947	C14orf177	0	0	0	NA	NA	NA	NA
1949	C14orf180	0	0	0	NA	NA	NA	NA
1951	C14orf183	0	0	0	NA	NA	NA	NA
1968	C15orf2	0	0	0	NA	NA	NA	NA
1974	C15orf32	0	0	0	NA	NA	NA	NA
1984	C15orf43	0	0	0	NA	NA	NA	NA
1987	C15orf5	0	0	0	NA	NA	NA	NA
2001	C16orf11	0	0	0	NA	NA	NA	NA
2011	C16orf54	0	0	0	NA	NA	NA	NA
2027	C16orf82	0	0	0	NA	NA	NA	NA
2065	C17orf64	0	0	0	NA	NA	NA	NA
2067	C17orf66	0	0	0	NA	NA	NA	NA
2075	C17orf77	0	0	0	NA	NA	NA	NA
2080	C17orf82	0	0	0	NA	NA	NA	NA
2087	C17orf99	0	0	0	NA	NA	NA	NA
2091	C18orf26	0	0	0	NA	NA	NA	NA
2098	C18orf63	0	0	0	NA	NA	NA	NA
2126	C19orf59	0	0	0	NA	NA	NA	NA
2135	C19orf75	0	0	0	NA	NA	NA	NA
2149	C1orf110	0	0	0	NA	NA	NA	NA
2159	C1orf127	0	0	0	NA	NA	NA	NA
2161	C1orf130	0	0	0	NA	NA	NA	NA
2165	C1orf140	0	0	0	NA	NA	NA	NA
2168	C1orf146	0	0	0	NA	NA	NA	NA
2176	C1orf172	0	0	0	NA	NA	NA	NA
2182	C1orf185	0	0	0	NA	NA	NA	NA
2183	C1orf186	0	0	0	NA	NA	NA	NA
2190	C1orf200	0	0	0	NA	NA	NA	NA
2218	C1orf64	0	0	0	NA	NA	NA	NA
2219	C1orf65	0	0	0	NA	NA	NA	NA
2220	C1orf68	0	0	0	NA	NA	NA	NA
2231	C1QA	0	0	0	NA	NA	NA	NA
2232	C1QB	0	0	0	NA	NA	NA	NA
2234	C1QC	0	0	0	NA	NA	NA	NA
2246	C1QTNF7	0	0	0	NA	NA	NA	NA
2263	C20orf151	0	0	0	NA	NA	NA	NA
2266	C20orf166	0	0	0	NA	NA	NA	NA
2286	C20orf54	0	0	0	NA	NA	NA	NA
2289	C20orf79	0	0	0	NA	NA	NA	NA
2290	C20orf85	0	0	0	NA	NA	NA	NA
2294	C21orf128	0	0	0	NA	NA	NA	NA
2300	C21orf54	0	0	0	NA	NA	NA	NA
2309	C21orf90	0	0	0	NA	NA	NA	NA
2320	C22orf31	0	0	0	NA	NA	NA	NA
2322	C22orf33	0	0	0	NA	NA	NA	NA
2323	C22orf34	0	0	0	NA	NA	NA	NA
2326	C22orf42	0	0	0	NA	NA	NA	NA
2334	C2CD4B	0	0	0	NA	NA	NA	NA
2336	C2CD4D	0	0	0	NA	NA	NA	NA
2352	C2orf51	0	0	0	NA	NA	NA	NA
2357	C2orf57	0	0	0	NA	NA	NA	NA
2358	C2orf61	0	0	0	NA	NA	NA	NA
2367	C2orf71	0	0	0	NA	NA	NA	NA
2369	C2orf73	0	0	0	NA	NA	NA	NA
2377	C2orf83	0	0	0	NA	NA	NA	NA
2395	C3orf30	0	0	0	NA	NA	NA	NA
2408	C3orf55	0	0	0	NA	NA	NA	NA
2421	C3orf79	0	0	0	NA	NA	NA	NA
2423	C3P1	0	0	0	NA	NA	NA	NA
2432	C4orf17	0	0	0	NA	NA	NA	NA
2447	C4orf40	0	0	0	NA	NA	NA	NA
2480	C5orf46	0	0	0	NA	NA	NA	NA
2485	C5orf52	0	0	0	NA	NA	NA	NA
2497	C6orf10_loc2	0	0	0	NA	NA	NA	NA
2506	C6orf123	0	0	0	NA	NA	NA	NA
2509	C6orf126	0	0	0	NA	NA	NA	NA
2510	C6orf127	0	0	0	NA	NA	NA	NA
2512	C6orf132	0	0	0	NA	NA	NA	NA
2516	C6orf146	0	0	0	NA	NA	NA	NA
2526	C6orf186	0	0	0	NA	NA	NA	NA
2527	C6orf191	0	0	0	NA	NA	NA	NA
2534	C6orf221	0	0	0	NA	NA	NA	NA
2547	C6orf7	0	0	0	NA	NA	NA	NA
2564	C7orf33	0	0	0	NA	NA	NA	NA
2565	C7orf34	0	0	0	NA	NA	NA	NA
2570	C7orf45	0	0	0	NA	NA	NA	NA
2584	C7orf66	0	0	0	NA	NA	NA	NA
2585	C7orf69	0	0	0	NA	NA	NA	NA
2588	C7orf72	0	0	0	NA	NA	NA	NA
2590	C8A	0	0	0	NA	NA	NA	NA
2594	C8orf22	0	0	0	NA	NA	NA	NA
2597	C8orf34	0	0	0	NA	NA	NA	NA
2608	C8orf47	0	0	0	NA	NA	NA	NA
2615	C8orf71	0	0	0	NA	NA	NA	NA
2617	C8orf74	0	0	0	NA	NA	NA	NA
2632	C9orf106	0	0	0	NA	NA	NA	NA
2639	C9orf128	0	0	0	NA	NA	NA	NA
2646	C9orf146	0	0	0	NA	NA	NA	NA
2649	C9orf153	0	0	0	NA	NA	NA	NA
2664	C9orf29	0	0	0	NA	NA	NA	NA
2678	C9orf57	0	0	0	NA	NA	NA	NA
2680	C9orf66	0	0	0	NA	NA	NA	NA
2690	C9orf84	0	0	0	NA	NA	NA	NA
2699	CA1	0	0	0	NA	NA	NA	NA
2707	CA4	0	0	0	NA	NA	NA	NA
2721	CABP2	0	0	0	NA	NA	NA	NA
2725	CABS1	0	0	0	NA	NA	NA	NA
2737	CACNA1S	0	0	0	NA	NA	NA	NA
2747	CACNG2	0	0	0	NA	NA	NA	NA
2775	CALHM3	0	0	0	NA	NA	NA	NA
2779	CALML3	0	0	0	NA	NA	NA	NA
2781	CALML5	0	0	0	NA	NA	NA	NA
2803	CAMP	0	0	0	NA	NA	NA	NA
2820	CAPN13	0	0	0	NA	NA	NA	NA
2838	CAPZA3	0	0	0	NA	NA	NA	NA
2844	CARD17	0	0	0	NA	NA	NA	NA
2855	CARTPT	0	0	0	NA	NA	NA	NA
2868	CASP14	0	0	0	NA	NA	NA	NA
2889	CATSPER4	0	0	0	NA	NA	NA	NA
2900	CBLC	0	0	0	NA	NA	NA	NA
2902	CBLN1	0	0	0	NA	NA	NA	NA
2941	CCDC105	0	0	0	NA	NA	NA	NA
2990	CCDC155	0	0	0	NA	NA	NA	NA
2992	CCDC158	0	0	0	NA	NA	NA	NA
2999	CCDC166	0	0	0	NA	NA	NA	NA
3011	CCDC27	0	0	0	NA	NA	NA	NA
3019	CCDC37	0	0	0	NA	NA	NA	NA
3024	CCDC42	0	0	0	NA	NA	NA	NA
3032	CCDC54	0	0	0	NA	NA	NA	NA
3038	CCDC60	0	0	0	NA	NA	NA	NA
3041	CCDC63	0	0	0	NA	NA	NA	NA
3047	CCDC68	0	0	0	NA	NA	NA	NA
3052	CCDC71L	0	0	0	NA	NA	NA	NA
3066	CCDC83	0	0	0	NA	NA	NA	NA
3089	CCK	0	0	0	NA	NA	NA	NA
3092	CCL1	0	0	0	NA	NA	NA	NA
3095	CCL14	0	0	0	NA	NA	NA	NA
3096	CCL14-CCL15	0	0	0	NA	NA	NA	NA
3097	CCL15	0	0	0	NA	NA	NA	NA
3098	CCL16	0	0	0	NA	NA	NA	NA
3099	CCL17	0	0	0	NA	NA	NA	NA
3100	CCL18	0	0	0	NA	NA	NA	NA
3101	CCL19	0	0	0	NA	NA	NA	NA
3104	CCL21	0	0	0	NA	NA	NA	NA
3105	CCL22	0	0	0	NA	NA	NA	NA
3106	CCL23	0	0	0	NA	NA	NA	NA
3107	CCL24	0	0	0	NA	NA	NA	NA
3111	CCL28	0	0	0	NA	NA	NA	NA
3112	CCL3	0	0	0	NA	NA	NA	NA
3113	CCL3L1_loc1	0	0	0	NA	NA	NA	NA
3114	CCL3L1_loc2	0	0	0	NA	NA	NA	NA
3115	CCL3L3_loc1	0	0	0	NA	NA	NA	NA
3116	CCL3L3_loc2	0	0	0	NA	NA	NA	NA
3118	CCL4L1_loc1	0	0	0	NA	NA	NA	NA
3119	CCL4L1_loc2	0	0	0	NA	NA	NA	NA
3120	CCL4L2_loc1	0	0	0	NA	NA	NA	NA
3121	CCL4L2_loc2	0	0	0	NA	NA	NA	NA
3124	CCL8	0	0	0	NA	NA	NA	NA
3160	CCR3	0	0	0	NA	NA	NA	NA
3162	CCR5	0	0	0	NA	NA	NA	NA
3165	CCR8	0	0	0	NA	NA	NA	NA
3168	CCRL2	0	0	0	NA	NA	NA	NA
3181	CCT8L2	0	0	0	NA	NA	NA	NA
3189	CD163	0	0	0	NA	NA	NA	NA
3196	CD1A	0	0	0	NA	NA	NA	NA
3197	CD1B	0	0	0	NA	NA	NA	NA
3198	CD1C	0	0	0	NA	NA	NA	NA
3200	CD1E	0	0	0	NA	NA	NA	NA
3201	CD2	0	0	0	NA	NA	NA	NA
3204	CD200R1L	0	0	0	NA	NA	NA	NA
3210	CD244	0	0	0	NA	NA	NA	NA
3219	CD300A	0	0	0	NA	NA	NA	NA
3221	CD300E	0	0	0	NA	NA	NA	NA
3223	CD300LD	0	0	0	NA	NA	NA	NA
3224	CD300LF	0	0	0	NA	NA	NA	NA
3225	CD300LG	0	0	0	NA	NA	NA	NA
3233	CD3D	0	0	0	NA	NA	NA	NA
3234	CD3E	0	0	0	NA	NA	NA	NA
3236	CD3G	0	0	0	NA	NA	NA	NA
3238	CD40	0	0	0	NA	NA	NA	NA
3239	CD40LG	0	0	0	NA	NA	NA	NA
3243	CD48	0	0	0	NA	NA	NA	NA
3245	CD52	0	0	0	NA	NA	NA	NA
3247	CD55	0	0	0	NA	NA	NA	NA
3250	CD5L	0	0	0	NA	NA	NA	NA
3254	CD69	0	0	0	NA	NA	NA	NA
3260	CD79B	0	0	0	NA	NA	NA	NA
3266	CD86	0	0	0	NA	NA	NA	NA
3268	CD8B	0	0	0	NA	NA	NA	NA
3270	CD93	0	0	0	NA	NA	NA	NA
3278	CDA	0	0	0	NA	NA	NA	NA
3407	CDRT15P2	0	0	0	NA	NA	NA	NA
3409	CDRT7	0	0	0	NA	NA	NA	NA
3417	CDX4	0	0	0	NA	NA	NA	NA
3418	CDY1_loc1	0	0	0	NA	NA	NA	NA
3419	CDY1_loc2	0	0	0	NA	NA	NA	NA
3420	CDY1B_loc1	0	0	0	NA	NA	NA	NA
3421	CDY1B_loc2	0	0	0	NA	NA	NA	NA
3422	CDY2A_loc1	0	0	0	NA	NA	NA	NA
3423	CDY2A_loc2	0	0	0	NA	NA	NA	NA
3424	CDY2B_loc1	0	0	0	NA	NA	NA	NA
3425	CDY2B_loc2	0	0	0	NA	NA	NA	NA
3429	CEACAM16	0	0	0	NA	NA	NA	NA
3430	CEACAM18	0	0	0	NA	NA	NA	NA
3433	CEACAM21	0	0	0	NA	NA	NA	NA
3435	CEACAM3	0	0	0	NA	NA	NA	NA
3436	CEACAM4	0	0	0	NA	NA	NA	NA
3437	CEACAM5	0	0	0	NA	NA	NA	NA
3439	CEACAM7	0	0	0	NA	NA	NA	NA
3440	CEACAM8	0	0	0	NA	NA	NA	NA
3444	CEBPE	0	0	0	NA	NA	NA	NA
3449	CECR3	0	0	0	NA	NA	NA	NA
3453	CECR7	0	0	0	NA	NA	NA	NA
3455	CELA1	0	0	0	NA	NA	NA	NA
3458	CELA3A	0	0	0	NA	NA	NA	NA
3459	CELA3B	0	0	0	NA	NA	NA	NA
3490	CENPVL1_loc1	0	0	0	NA	NA	NA	NA
3491	CENPVL1_loc2	0	0	0	NA	NA	NA	NA
3535	CES1P1	0	0	0	NA	NA	NA	NA
3540	CES5A	0	0	0	NA	NA	NA	NA
3541	CES5AP1	0	0	0	NA	NA	NA	NA
3542	CETN1	0	0	0	NA	NA	NA	NA
3548	CFC1_loc1	0	0	0	NA	NA	NA	NA
3549	CFC1_loc2	0	0	0	NA	NA	NA	NA
3550	CFC1B_loc1	0	0	0	NA	NA	NA	NA
3551	CFC1B_loc2	0	0	0	NA	NA	NA	NA
3556	CFHR2	0	0	0	NA	NA	NA	NA
3557	CFHR3	0	0	0	NA	NA	NA	NA
3558	CFHR4	0	0	0	NA	NA	NA	NA
3559	CFHR5	0	0	0	NA	NA	NA	NA
3569	CGA	0	0	0	NA	NA	NA	NA
3571	CGB1	0	0	0	NA	NA	NA	NA
3573	CGB5	0	0	0	NA	NA	NA	NA
3575	CGB8	0	0	0	NA	NA	NA	NA
3619	CHIA	0	0	0	NA	NA	NA	NA
3644	CHODL-AS1	0	0	0	NA	NA	NA	NA
3647	CHP2	0	0	0	NA	NA	NA	NA
3663	CHRNA2	0	0	0	NA	NA	NA	NA
3667	CHRNA6	0	0	0	NA	NA	NA	NA
3672	CHRNB3	0	0	0	NA	NA	NA	NA
3674	CHRND	0	0	0	NA	NA	NA	NA
3681	CHST13	0	0	0	NA	NA	NA	NA
3686	CHST4	0	0	0	NA	NA	NA	NA
3705	CIB3	0	0	0	NA	NA	NA	NA
3706	CIB4	0	0	0	NA	NA	NA	NA
3745	CLC	0	0	0	NA	NA	NA	NA
3746	CLCA1	0	0	0	NA	NA	NA	NA
3747	CLCA2	0	0	0	NA	NA	NA	NA
3749	CLCA4	0	0	0	NA	NA	NA	NA
3768	CLDN17	0	0	0	NA	NA	NA	NA
3776	CLDN25	0	0	0	NA	NA	NA	NA
3777	CLDN3	0	0	0	NA	NA	NA	NA
3782	CLDN8	0	0	0	NA	NA	NA	NA
3786	CLEC10A	0	0	0	NA	NA	NA	NA
3788	CLEC12A	0	0	0	NA	NA	NA	NA
3789	CLEC12B	0	0	0	NA	NA	NA	NA
3792	CLEC17A	0	0	0	NA	NA	NA	NA
3796	CLEC1A	0	0	0	NA	NA	NA	NA
3797	CLEC1B	0	0	0	NA	NA	NA	NA
3798	CLEC2A	0	0	0	NA	NA	NA	NA
3799	CLEC2B	0	0	0	NA	NA	NA	NA
3805	CLEC4C	0	0	0	NA	NA	NA	NA
3806	CLEC4D	0	0	0	NA	NA	NA	NA
3807	CLEC4E	0	0	0	NA	NA	NA	NA
3809	CLEC4G	0	0	0	NA	NA	NA	NA
3810	CLEC4GP1	0	0	0	NA	NA	NA	NA
3812	CLEC5A	0	0	0	NA	NA	NA	NA
3813	CLEC6A	0	0	0	NA	NA	NA	NA
3814	CLEC7A	0	0	0	NA	NA	NA	NA
3815	CLEC9A	0	0	0	NA	NA	NA	NA
3816	CLECL1	0	0	0	NA	NA	NA	NA
3834	CLLU1	0	0	0	NA	NA	NA	NA
3835	CLLU1OS	0	0	0	NA	NA	NA	NA
3848	CLPS	0	0	0	NA	NA	NA	NA
3852	CLRN1	0	0	0	NA	NA	NA	NA
3854	CLRN2	0	0	0	NA	NA	NA	NA
3855	CLRN3	0	0	0	NA	NA	NA	NA
3871	CMAHP	0	0	0	NA	NA	NA	NA
3889	CNBD1	0	0	0	NA	NA	NA	NA
3898	CNGB1	0	0	0	NA	NA	NA	NA
3899	CNGB3	0	0	0	NA	NA	NA	NA
4005	COL6A4P1	0	0	0	NA	NA	NA	NA
4007	COL6A5	0	0	0	NA	NA	NA	NA
4077	COX4I2	0	0	0	NA	NA	NA	NA
4082	COX6A2	0	0	0	NA	NA	NA	NA
4090	COX7B2	0	0	0	NA	NA	NA	NA
4097	CPA3	0	0	0	NA	NA	NA	NA
4101	CPAMD8	0	0	0	NA	NA	NA	NA
4113	CPLX4	0	0	0	NA	NA	NA	NA
4115	CPN1	0	0	0	NA	NA	NA	NA
4130	CPS1-IT1	0	0	0	NA	NA	NA	NA
4144	CPXCR1	0	0	0	NA	NA	NA	NA
4146	CPXM2	0	0	0	NA	NA	NA	NA
4150	CR2	0	0	0	NA	NA	NA	NA
4161	CRCT1	0	0	0	NA	NA	NA	NA
4177	CRH	0	0	0	NA	NA	NA	NA
4187	CRISP1	0	0	0	NA	NA	NA	NA
4188	CRISP2	0	0	0	NA	NA	NA	NA
4189	CRISP3	0	0	0	NA	NA	NA	NA
4195	CRLF2_loc1	0	0	0	NA	NA	NA	NA
4196	CRLF2_loc2	0	0	0	NA	NA	NA	NA
4202	CRNN	0	0	0	NA	NA	NA	NA
4207	CRP	0	0	0	NA	NA	NA	NA
4215	CRX	0	0	0	NA	NA	NA	NA
4253	CSF2RA_loc1	0	0	0	NA	NA	NA	NA
4254	CSF2RA_loc2	0	0	0	NA	NA	NA	NA
4255	CSF2RB	0	0	0	NA	NA	NA	NA
4256	CSF3	0	0	0	NA	NA	NA	NA
4257	CSF3R	0	0	0	NA	NA	NA	NA
4261	CSH2	0	0	0	NA	NA	NA	NA
4262	CSHL1	0	0	0	NA	NA	NA	NA
4267	CSN1S1	0	0	0	NA	NA	NA	NA
4268	CSN1S2AP	0	0	0	NA	NA	NA	NA
4269	CSN1S2BP	0	0	0	NA	NA	NA	NA
4270	CSN2	0	0	0	NA	NA	NA	NA
4271	CSN3	0	0	0	NA	NA	NA	NA
4298	CST11	0	0	0	NA	NA	NA	NA
4299	CST2	0	0	0	NA	NA	NA	NA
4301	CST4	0	0	0	NA	NA	NA	NA
4302	CST5	0	0	0	NA	NA	NA	NA
4305	CST8	0	0	0	NA	NA	NA	NA
4306	CST9	0	0	0	NA	NA	NA	NA
4307	CST9L	0	0	0	NA	NA	NA	NA
4308	CSTA	0	0	0	NA	NA	NA	NA
4314	CSTL1	0	0	0	NA	NA	NA	NA
4315	CSTT	0	0	0	NA	NA	NA	NA
4316	CT45A1	0	0	0	NA	NA	NA	NA
4317	CT45A2	0	0	0	NA	NA	NA	NA
4318	CT45A3	0	0	0	NA	NA	NA	NA
4319	CT45A4_loc1	0	0	0	NA	NA	NA	NA
4323	CT47A1_loc1	0	0	0	NA	NA	NA	NA
4324	CT47A1_loc10	0	0	0	NA	NA	NA	NA
4325	CT47A1_loc2	0	0	0	NA	NA	NA	NA
4326	CT47A1_loc3	0	0	0	NA	NA	NA	NA
4327	CT47A1_loc4	0	0	0	NA	NA	NA	NA
4328	CT47A1_loc5	0	0	0	NA	NA	NA	NA
4329	CT47A1_loc6	0	0	0	NA	NA	NA	NA
4330	CT47A1_loc7	0	0	0	NA	NA	NA	NA
4331	CT47A1_loc8	0	0	0	NA	NA	NA	NA
4332	CT47A1_loc9	0	0	0	NA	NA	NA	NA
4333	CT47A10_loc1	0	0	0	NA	NA	NA	NA
4334	CT47A10_loc2	0	0	0	NA	NA	NA	NA
4335	CT47A10_loc3	0	0	0	NA	NA	NA	NA
4336	CT47A10_loc4	0	0	0	NA	NA	NA	NA
4337	CT47A10_loc5	0	0	0	NA	NA	NA	NA
4338	CT47A10_loc6	0	0	0	NA	NA	NA	NA
4339	CT47A10_loc7	0	0	0	NA	NA	NA	NA
4340	CT47A10_loc8	0	0	0	NA	NA	NA	NA
4341	CT47A10_loc9	0	0	0	NA	NA	NA	NA
4342	CT47A11_loc1	0	0	0	NA	NA	NA	NA
4343	CT47A11_loc2	0	0	0	NA	NA	NA	NA
4344	CT47A11_loc3	0	0	0	NA	NA	NA	NA
4345	CT47A11_loc4	0	0	0	NA	NA	NA	NA
4346	CT47A11_loc5	0	0	0	NA	NA	NA	NA
4347	CT47A11_loc6	0	0	0	NA	NA	NA	NA
4348	CT47A11_loc7	0	0	0	NA	NA	NA	NA
4349	CT47A11_loc8	0	0	0	NA	NA	NA	NA
4350	CT47A11_loc9	0	0	0	NA	NA	NA	NA
4351	CT47A12_loc1	0	0	0	NA	NA	NA	NA
4352	CT47A12_loc2	0	0	0	NA	NA	NA	NA
4353	CT47A12_loc3	0	0	0	NA	NA	NA	NA
4354	CT47A12_loc4	0	0	0	NA	NA	NA	NA
4355	CT47A12_loc5	0	0	0	NA	NA	NA	NA
4356	CT47A12_loc6	0	0	0	NA	NA	NA	NA
4357	CT47A12_loc7	0	0	0	NA	NA	NA	NA
4358	CT47A12_loc8	0	0	0	NA	NA	NA	NA
4359	CT47A12_loc9	0	0	0	NA	NA	NA	NA
4360	CT47A2_loc1	0	0	0	NA	NA	NA	NA
4361	CT47A2_loc2	0	0	0	NA	NA	NA	NA
4362	CT47A2_loc3	0	0	0	NA	NA	NA	NA
4363	CT47A2_loc4	0	0	0	NA	NA	NA	NA
4364	CT47A2_loc5	0	0	0	NA	NA	NA	NA
4365	CT47A2_loc6	0	0	0	NA	NA	NA	NA
4366	CT47A2_loc7	0	0	0	NA	NA	NA	NA
4367	CT47A2_loc8	0	0	0	NA	NA	NA	NA
4368	CT47A2_loc9	0	0	0	NA	NA	NA	NA
4369	CT47A3_loc1	0	0	0	NA	NA	NA	NA
4370	CT47A3_loc2	0	0	0	NA	NA	NA	NA
4371	CT47A3_loc3	0	0	0	NA	NA	NA	NA
4372	CT47A3_loc4	0	0	0	NA	NA	NA	NA
4373	CT47A3_loc5	0	0	0	NA	NA	NA	NA
4374	CT47A3_loc6	0	0	0	NA	NA	NA	NA
4375	CT47A3_loc7	0	0	0	NA	NA	NA	NA
4376	CT47A3_loc8	0	0	0	NA	NA	NA	NA
4377	CT47A3_loc9	0	0	0	NA	NA	NA	NA
4378	CT47A4_loc1	0	0	0	NA	NA	NA	NA
4379	CT47A4_loc2	0	0	0	NA	NA	NA	NA
4380	CT47A4_loc3	0	0	0	NA	NA	NA	NA
4381	CT47A4_loc4	0	0	0	NA	NA	NA	NA
4382	CT47A4_loc5	0	0	0	NA	NA	NA	NA
4383	CT47A4_loc6	0	0	0	NA	NA	NA	NA
4384	CT47A4_loc7	0	0	0	NA	NA	NA	NA
4385	CT47A4_loc8	0	0	0	NA	NA	NA	NA
4386	CT47A4_loc9	0	0	0	NA	NA	NA	NA
4387	CT47A5_loc1	0	0	0	NA	NA	NA	NA
4388	CT47A5_loc2	0	0	0	NA	NA	NA	NA
4389	CT47A5_loc3	0	0	0	NA	NA	NA	NA
4390	CT47A5_loc4	0	0	0	NA	NA	NA	NA
4391	CT47A5_loc5	0	0	0	NA	NA	NA	NA
4392	CT47A5_loc6	0	0	0	NA	NA	NA	NA
4393	CT47A5_loc7	0	0	0	NA	NA	NA	NA
4394	CT47A5_loc8	0	0	0	NA	NA	NA	NA
4395	CT47A5_loc9	0	0	0	NA	NA	NA	NA
4396	CT47A6_loc1	0	0	0	NA	NA	NA	NA
4397	CT47A6_loc10	0	0	0	NA	NA	NA	NA
4398	CT47A6_loc2	0	0	0	NA	NA	NA	NA
4399	CT47A6_loc3	0	0	0	NA	NA	NA	NA
4400	CT47A6_loc4	0	0	0	NA	NA	NA	NA
4401	CT47A6_loc5	0	0	0	NA	NA	NA	NA
4402	CT47A6_loc6	0	0	0	NA	NA	NA	NA
4403	CT47A6_loc7	0	0	0	NA	NA	NA	NA
4404	CT47A6_loc8	0	0	0	NA	NA	NA	NA
4405	CT47A6_loc9	0	0	0	NA	NA	NA	NA
4406	CT47A7	0	0	0	NA	NA	NA	NA
4407	CT47A8_loc1	0	0	0	NA	NA	NA	NA
4408	CT47A8_loc2	0	0	0	NA	NA	NA	NA
4409	CT47A8_loc3	0	0	0	NA	NA	NA	NA
4410	CT47A8_loc4	0	0	0	NA	NA	NA	NA
4411	CT47A8_loc5	0	0	0	NA	NA	NA	NA
4412	CT47A8_loc6	0	0	0	NA	NA	NA	NA
4413	CT47A8_loc7	0	0	0	NA	NA	NA	NA
4414	CT47A8_loc8	0	0	0	NA	NA	NA	NA
4415	CT47A8_loc9	0	0	0	NA	NA	NA	NA
4416	CT47A9_loc1	0	0	0	NA	NA	NA	NA
4417	CT47A9_loc2	0	0	0	NA	NA	NA	NA
4418	CT47A9_loc3	0	0	0	NA	NA	NA	NA
4419	CT47A9_loc4	0	0	0	NA	NA	NA	NA
4420	CT47A9_loc5	0	0	0	NA	NA	NA	NA
4421	CT47A9_loc6	0	0	0	NA	NA	NA	NA
4422	CT47A9_loc7	0	0	0	NA	NA	NA	NA
4423	CT47A9_loc8	0	0	0	NA	NA	NA	NA
4424	CT47A9_loc9	0	0	0	NA	NA	NA	NA
4425	CT47B1	0	0	0	NA	NA	NA	NA
4428	CTAG1A_loc2	0	0	0	NA	NA	NA	NA
4430	CTAG1B_loc2	0	0	0	NA	NA	NA	NA
4431	CTAG2	0	0	0	NA	NA	NA	NA
4481	CTSE	0	0	0	NA	NA	NA	NA
4483	CTSG	0	0	0	NA	NA	NA	NA
4502	CTXN3	0	0	0	NA	NA	NA	NA
4525	CWH43	0	0	0	NA	NA	NA	NA
4531	CXCL1	0	0	0	NA	NA	NA	NA
4535	CXCL13	0	0	0	NA	NA	NA	NA
4538	CXCL17	0	0	0	NA	NA	NA	NA
4542	CXCL6	0	0	0	NA	NA	NA	NA
4544	CXCR1	0	0	0	NA	NA	NA	NA
4546	CXCR2P1	0	0	0	NA	NA	NA	NA
4547	CXCR3	0	0	0	NA	NA	NA	NA
4553	CXorf21	0	0	0	NA	NA	NA	NA
4554	CXorf22	0	0	0	NA	NA	NA	NA
4559	CXorf30	0	0	0	NA	NA	NA	NA
4565	CXorf41	0	0	0	NA	NA	NA	NA
4568	CXorf49_loc2	0	0	0	NA	NA	NA	NA
4569	CXorf49B_loc1	0	0	0	NA	NA	NA	NA
4571	CXorf51A_loc1	0	0	0	NA	NA	NA	NA
4572	CXorf51A_loc2	0	0	0	NA	NA	NA	NA
4573	CXorf51B_loc1	0	0	0	NA	NA	NA	NA
4574	CXorf51B_loc2	0	0	0	NA	NA	NA	NA
4578	CXorf59	0	0	0	NA	NA	NA	NA
4579	CXorf61	0	0	0	NA	NA	NA	NA
4582	CXorf66	0	0	0	NA	NA	NA	NA
4583	CXorf68	0	0	0	NA	NA	NA	NA
4587	CXXC1P1	0	0	0	NA	NA	NA	NA
4613	CYLC1	0	0	0	NA	NA	NA	NA
4614	CYLC2	0	0	0	NA	NA	NA	NA
4616	CYMP	0	0	0	NA	NA	NA	NA
4617	CYP11A1	0	0	0	NA	NA	NA	NA
4618	CYP11B1	0	0	0	NA	NA	NA	NA
4619	CYP11B2	0	0	0	NA	NA	NA	NA
4637	CYP2A13	0	0	0	NA	NA	NA	NA
4662	CYP4A11	0	0	0	NA	NA	NA	NA
4663	CYP4A22	0	0	0	NA	NA	NA	NA
4664	CYP4B1	0	0	0	NA	NA	NA	NA
4666	CYP4F12	0	0	0	NA	NA	NA	NA
4668	CYP4F22	0	0	0	NA	NA	NA	NA
4671	CYP4F30P	0	0	0	NA	NA	NA	NA
4673	CYP4F8	0	0	0	NA	NA	NA	NA
4676	CYP4Z1	0	0	0	NA	NA	NA	NA
4677	CYP4Z2P	0	0	0	NA	NA	NA	NA
4679	CYP7A1	0	0	0	NA	NA	NA	NA
4680	CYP7B1	0	0	0	NA	NA	NA	NA
4681	CYP8B1	0	0	0	NA	NA	NA	NA
4684	CYSLTR1	0	0	0	NA	NA	NA	NA
4689	CYTH4	0	0	0	NA	NA	NA	NA
4692	CYYR1	0	0	0	NA	NA	NA	NA
4713	DAO	0	0	0	NA	NA	NA	NA
4714	DAOA	0	0	0	NA	NA	NA	NA
4715	DAOA-AS1	0	0	0	NA	NA	NA	NA
4759	DCAF12L1	0	0	0	NA	NA	NA	NA
4760	DCAF12L2	0	0	0	NA	NA	NA	NA
4778	DCD	0	0	0	NA	NA	NA	NA
4824	DDI1	0	0	0	NA	NA	NA	NA
4866	DDX43	0	0	0	NA	NA	NA	NA
4874	DDX53	0	0	0	NA	NA	NA	NA
4890	DEFA1_loc1	0	0	0	NA	NA	NA	NA
4891	DEFA1_loc2	0	0	0	NA	NA	NA	NA
4892	DEFA1_loc3	0	0	0	NA	NA	NA	NA
4893	DEFA10P	0	0	0	NA	NA	NA	NA
4894	DEFA1B_loc1	0	0	0	NA	NA	NA	NA
4895	DEFA1B_loc2	0	0	0	NA	NA	NA	NA
4896	DEFA1B_loc3	0	0	0	NA	NA	NA	NA
4897	DEFA3	0	0	0	NA	NA	NA	NA
4898	DEFA4	0	0	0	NA	NA	NA	NA
4899	DEFA5	0	0	0	NA	NA	NA	NA
4900	DEFA6	0	0	0	NA	NA	NA	NA
4901	DEFB1	0	0	0	NA	NA	NA	NA
4902	DEFB103A_loc1	0	0	0	NA	NA	NA	NA
4903	DEFB103A_loc2	0	0	0	NA	NA	NA	NA
4904	DEFB103B_loc1	0	0	0	NA	NA	NA	NA
4905	DEFB103B_loc2	0	0	0	NA	NA	NA	NA
4906	DEFB104A_loc1	0	0	0	NA	NA	NA	NA
4907	DEFB104A_loc2	0	0	0	NA	NA	NA	NA
4908	DEFB104B_loc1	0	0	0	NA	NA	NA	NA
4909	DEFB104B_loc2	0	0	0	NA	NA	NA	NA
4910	DEFB105A_loc1	0	0	0	NA	NA	NA	NA
4911	DEFB105A_loc2	0	0	0	NA	NA	NA	NA
4912	DEFB105B_loc1	0	0	0	NA	NA	NA	NA
4913	DEFB105B_loc2	0	0	0	NA	NA	NA	NA
4914	DEFB106A_loc1	0	0	0	NA	NA	NA	NA
4915	DEFB106A_loc2	0	0	0	NA	NA	NA	NA
4916	DEFB106B_loc1	0	0	0	NA	NA	NA	NA
4917	DEFB106B_loc2	0	0	0	NA	NA	NA	NA
4918	DEFB107A_loc1	0	0	0	NA	NA	NA	NA
4919	DEFB107A_loc2	0	0	0	NA	NA	NA	NA
4920	DEFB107B_loc1	0	0	0	NA	NA	NA	NA
4921	DEFB107B_loc2	0	0	0	NA	NA	NA	NA
4922	DEFB108B	0	0	0	NA	NA	NA	NA
4926	DEFB110	0	0	0	NA	NA	NA	NA
4927	DEFB112	0	0	0	NA	NA	NA	NA
4928	DEFB113	0	0	0	NA	NA	NA	NA
4929	DEFB114	0	0	0	NA	NA	NA	NA
4930	DEFB115	0	0	0	NA	NA	NA	NA
4931	DEFB116	0	0	0	NA	NA	NA	NA
4932	DEFB118	0	0	0	NA	NA	NA	NA
4933	DEFB119	0	0	0	NA	NA	NA	NA
4934	DEFB121	0	0	0	NA	NA	NA	NA
4935	DEFB122	0	0	0	NA	NA	NA	NA
4936	DEFB123	0	0	0	NA	NA	NA	NA
4937	DEFB124	0	0	0	NA	NA	NA	NA
4938	DEFB125	0	0	0	NA	NA	NA	NA
4939	DEFB126	0	0	0	NA	NA	NA	NA
4940	DEFB127	0	0	0	NA	NA	NA	NA
4941	DEFB128	0	0	0	NA	NA	NA	NA
4942	DEFB129	0	0	0	NA	NA	NA	NA
4943	DEFB130_loc1	0	0	0	NA	NA	NA	NA
4944	DEFB130_loc2	0	0	0	NA	NA	NA	NA
4946	DEFB132	0	0	0	NA	NA	NA	NA
4947	DEFB133	0	0	0	NA	NA	NA	NA
4948	DEFB134	0	0	0	NA	NA	NA	NA
4950	DEFB136	0	0	0	NA	NA	NA	NA
4951	DEFB4A	0	0	0	NA	NA	NA	NA
4952	DEFB4B	0	0	0	NA	NA	NA	NA
4953	DEFT1P_loc1	0	0	0	NA	NA	NA	NA
4954	DEFT1P_loc2	0	0	0	NA	NA	NA	NA
4955	DEFT1P2_loc1	0	0	0	NA	NA	NA	NA
4956	DEFT1P2_loc2	0	0	0	NA	NA	NA	NA
4958	DEGS2	0	0	0	NA	NA	NA	NA
5067	DIO3	0	0	0	NA	NA	NA	NA
5068	DIO3OS	0	0	0	NA	NA	NA	NA
5075	DIRC1	0	0	0	NA	NA	NA	NA
5090	DKFZp434J0226	0	0	0	NA	NA	NA	NA
5093	DKFZp434L192	0	0	0	NA	NA	NA	NA
5103	DKFZp779M0652	0	0	0	NA	NA	NA	NA
5105	DKK2	0	0	0	NA	NA	NA	NA
5136	DLX4	0	0	0	NA	NA	NA	NA
5147	DMP1	0	0	0	NA	NA	NA	NA
5151	DMRT3	0	0	0	NA	NA	NA	NA
5159	DMRTC2	0	0	0	NA	NA	NA	NA
5183	DNAJA1P5	0	0	0	NA	NA	NA	NA
5193	DNAJB3	0	0	0	NA	NA	NA	NA
5225	DNAJC5B	0	0	0	NA	NA	NA	NA
5237	DNASE1L3	0	0	0	NA	NA	NA	NA
5248	DNM1P46	0	0	0	NA	NA	NA	NA
5257	DNMT3L	0	0	0	NA	NA	NA	NA
5259	DNTT	0	0	0	NA	NA	NA	NA
5263	DOC2B	0	0	0	NA	NA	NA	NA
5264	DOC2GP	0	0	0	NA	NA	NA	NA
5278	DOK2	0	0	0	NA	NA	NA	NA
5282	DOK6	0	0	0	NA	NA	NA	NA
5294	DPEP1	0	0	0	NA	NA	NA	NA
5295	DPEP2	0	0	0	NA	NA	NA	NA
5296	DPEP3	0	0	0	NA	NA	NA	NA
5315	DPPA2	0	0	0	NA	NA	NA	NA
5317	DPPA4	0	0	0	NA	NA	NA	NA
5318	DPPA5	0	0	0	NA	NA	NA	NA
5319	DPRX	0	0	0	NA	NA	NA	NA
5320	DPRXP4	0	0	0	NA	NA	NA	NA
5321	DPT	0	0	0	NA	NA	NA	NA
5343	DRD1	0	0	0	NA	NA	NA	NA
5347	DRD5	0	0	0	NA	NA	NA	NA
5353	DSC1	0	0	0	NA	NA	NA	NA
5355	DSC3	0	0	0	NA	NA	NA	NA
5357	DSCAM-AS1	0	0	0	NA	NA	NA	NA
5360	DSCR10	0	0	0	NA	NA	NA	NA
5362	DSCR4	0	0	0	NA	NA	NA	NA
5363	DSCR6	0	0	0	NA	NA	NA	NA
5364	DSCR8	0	0	0	NA	NA	NA	NA
5370	DSG3	0	0	0	NA	NA	NA	NA
5371	DSG4	0	0	0	NA	NA	NA	NA
5397	DUOXA2	0	0	0	NA	NA	NA	NA
5398	DUPD1	0	0	0	NA	NA	NA	NA
5414	DUSP21	0	0	0	NA	NA	NA	NA
5418	DUSP27	0	0	0	NA	NA	NA	NA
5429	DUX2_loc1	0	0	0	NA	NA	NA	NA
5430	DUX2_loc10	0	0	0	NA	NA	NA	NA
5431	DUX2_loc11	0	0	0	NA	NA	NA	NA
5432	DUX2_loc12	0	0	0	NA	NA	NA	NA
5433	DUX2_loc13	0	0	0	NA	NA	NA	NA
5434	DUX2_loc14	0	0	0	NA	NA	NA	NA
5435	DUX2_loc15	0	0	0	NA	NA	NA	NA
5436	DUX2_loc16	0	0	0	NA	NA	NA	NA
5437	DUX2_loc17	0	0	0	NA	NA	NA	NA
5438	DUX2_loc18	0	0	0	NA	NA	NA	NA
5439	DUX2_loc2	0	0	0	NA	NA	NA	NA
5440	DUX2_loc3	0	0	0	NA	NA	NA	NA
5441	DUX2_loc4	0	0	0	NA	NA	NA	NA
5442	DUX2_loc5	0	0	0	NA	NA	NA	NA
5443	DUX2_loc6	0	0	0	NA	NA	NA	NA
5444	DUX2_loc7	0	0	0	NA	NA	NA	NA
5445	DUX2_loc8	0	0	0	NA	NA	NA	NA
5446	DUX2_loc9	0	0	0	NA	NA	NA	NA
5447	DUX4_loc1	0	0	0	NA	NA	NA	NA
5448	DUX4_loc10	0	0	0	NA	NA	NA	NA
5449	DUX4_loc11	0	0	0	NA	NA	NA	NA
5450	DUX4_loc12	0	0	0	NA	NA	NA	NA
5451	DUX4_loc13	0	0	0	NA	NA	NA	NA
5452	DUX4_loc2	0	0	0	NA	NA	NA	NA
5453	DUX4_loc3	0	0	0	NA	NA	NA	NA
5454	DUX4_loc4	0	0	0	NA	NA	NA	NA
5455	DUX4_loc5	0	0	0	NA	NA	NA	NA
5456	DUX4_loc6	0	0	0	NA	NA	NA	NA
5457	DUX4_loc7	0	0	0	NA	NA	NA	NA
5458	DUX4_loc8	0	0	0	NA	NA	NA	NA
5459	DUX4_loc9	0	0	0	NA	NA	NA	NA
5460	DUX4L2_loc1	0	0	0	NA	NA	NA	NA
5461	DUX4L2_loc10	0	0	0	NA	NA	NA	NA
5462	DUX4L2_loc11	0	0	0	NA	NA	NA	NA
5463	DUX4L2_loc12	0	0	0	NA	NA	NA	NA
5464	DUX4L2_loc13	0	0	0	NA	NA	NA	NA
5465	DUX4L2_loc14	0	0	0	NA	NA	NA	NA
5466	DUX4L2_loc15	0	0	0	NA	NA	NA	NA
5467	DUX4L2_loc16	0	0	0	NA	NA	NA	NA
5468	DUX4L2_loc2	0	0	0	NA	NA	NA	NA
5469	DUX4L2_loc3	0	0	0	NA	NA	NA	NA
5470	DUX4L2_loc4	0	0	0	NA	NA	NA	NA
5471	DUX4L2_loc5	0	0	0	NA	NA	NA	NA
5472	DUX4L2_loc6	0	0	0	NA	NA	NA	NA
5473	DUX4L2_loc7	0	0	0	NA	NA	NA	NA
5474	DUX4L2_loc8	0	0	0	NA	NA	NA	NA
5475	DUX4L2_loc9	0	0	0	NA	NA	NA	NA
5476	DUX4L3_loc1	0	0	0	NA	NA	NA	NA
5477	DUX4L3_loc10	0	0	0	NA	NA	NA	NA
5478	DUX4L3_loc11	0	0	0	NA	NA	NA	NA
5479	DUX4L3_loc12	0	0	0	NA	NA	NA	NA
5480	DUX4L3_loc13	0	0	0	NA	NA	NA	NA
5481	DUX4L3_loc14	0	0	0	NA	NA	NA	NA
5482	DUX4L3_loc15	0	0	0	NA	NA	NA	NA
5483	DUX4L3_loc16	0	0	0	NA	NA	NA	NA
5484	DUX4L3_loc17	0	0	0	NA	NA	NA	NA
5485	DUX4L3_loc2	0	0	0	NA	NA	NA	NA
5486	DUX4L3_loc3	0	0	0	NA	NA	NA	NA
5487	DUX4L3_loc4	0	0	0	NA	NA	NA	NA
5488	DUX4L3_loc5	0	0	0	NA	NA	NA	NA
5489	DUX4L3_loc6	0	0	0	NA	NA	NA	NA
5490	DUX4L3_loc7	0	0	0	NA	NA	NA	NA
5491	DUX4L3_loc8	0	0	0	NA	NA	NA	NA
5492	DUX4L3_loc9	0	0	0	NA	NA	NA	NA
5493	DUX4L4_loc1	0	0	0	NA	NA	NA	NA
5494	DUX4L4_loc2	0	0	0	NA	NA	NA	NA
5495	DUX4L4_loc3	0	0	0	NA	NA	NA	NA
5496	DUX4L4_loc4	0	0	0	NA	NA	NA	NA
5497	DUX4L5_loc1	0	0	0	NA	NA	NA	NA
5498	DUX4L5_loc10	0	0	0	NA	NA	NA	NA
5499	DUX4L5_loc11	0	0	0	NA	NA	NA	NA
5500	DUX4L5_loc12	0	0	0	NA	NA	NA	NA
5501	DUX4L5_loc13	0	0	0	NA	NA	NA	NA
5502	DUX4L5_loc14	0	0	0	NA	NA	NA	NA
5503	DUX4L5_loc15	0	0	0	NA	NA	NA	NA
5504	DUX4L5_loc16	0	0	0	NA	NA	NA	NA
5505	DUX4L5_loc17	0	0	0	NA	NA	NA	NA
5506	DUX4L5_loc2	0	0	0	NA	NA	NA	NA
5507	DUX4L5_loc3	0	0	0	NA	NA	NA	NA
5508	DUX4L5_loc4	0	0	0	NA	NA	NA	NA
5509	DUX4L5_loc5	0	0	0	NA	NA	NA	NA
5510	DUX4L5_loc6	0	0	0	NA	NA	NA	NA
5511	DUX4L5_loc7	0	0	0	NA	NA	NA	NA
5512	DUX4L5_loc8	0	0	0	NA	NA	NA	NA
5513	DUX4L5_loc9	0	0	0	NA	NA	NA	NA
5514	DUX4L6_loc1	0	0	0	NA	NA	NA	NA
5515	DUX4L6_loc10	0	0	0	NA	NA	NA	NA
5516	DUX4L6_loc11	0	0	0	NA	NA	NA	NA
5517	DUX4L6_loc12	0	0	0	NA	NA	NA	NA
5518	DUX4L6_loc13	0	0	0	NA	NA	NA	NA
5519	DUX4L6_loc14	0	0	0	NA	NA	NA	NA
5520	DUX4L6_loc15	0	0	0	NA	NA	NA	NA
5521	DUX4L6_loc16	0	0	0	NA	NA	NA	NA
5522	DUX4L6_loc17	0	0	0	NA	NA	NA	NA
5523	DUX4L6_loc2	0	0	0	NA	NA	NA	NA
5524	DUX4L6_loc3	0	0	0	NA	NA	NA	NA
5525	DUX4L6_loc4	0	0	0	NA	NA	NA	NA
5526	DUX4L6_loc5	0	0	0	NA	NA	NA	NA
5527	DUX4L6_loc6	0	0	0	NA	NA	NA	NA
5528	DUX4L6_loc7	0	0	0	NA	NA	NA	NA
5529	DUX4L6_loc8	0	0	0	NA	NA	NA	NA
5530	DUX4L6_loc9	0	0	0	NA	NA	NA	NA
5531	DUX4L7	0	0	0	NA	NA	NA	NA
5532	DUXA	0	0	0	NA	NA	NA	NA
5562	DZANK1-AS1	0	0	0	NA	NA	NA	NA
5585	EBLN1	0	0	0	NA	NA	NA	NA
5595	ECEL1P2	0	0	0	NA	NA	NA	NA
5599	ECHDC3	0	0	0	NA	NA	NA	NA
5605	ECRP	0	0	0	NA	NA	NA	NA
5616	EDDM3A	0	0	0	NA	NA	NA	NA
5617	EDDM3B	0	0	0	NA	NA	NA	NA
5625	EDN3	0	0	0	NA	NA	NA	NA
5634	EEF1DP3	0	0	0	NA	NA	NA	NA
5642	EFCAB1	0	0	0	NA	NA	NA	NA
5678	EGFL7	0	0	0	NA	NA	NA	NA
5689	EGR4	0	0	0	NA	NA	NA	NA
5750	EIF4E1B	0	0	0	NA	NA	NA	NA
5778	ELF5	0	0	0	NA	NA	NA	NA
5806	ELTD1	0	0	0	NA	NA	NA	NA
5807	EMB	0	0	0	NA	NA	NA	NA
5809	EMCN	0	0	0	NA	NA	NA	NA
5828	EMR1	0	0	0	NA	NA	NA	NA
5830	EMR3	0	0	0	NA	NA	NA	NA
5831	EMR4P	0	0	0	NA	NA	NA	NA
5832	EMX1	0	0	0	NA	NA	NA	NA
5838	ENAM	0	0	0	NA	NA	NA	NA
5857	ENPEP	0	0	0	NA	NA	NA	NA
5864	ENPP7	0	0	0	NA	NA	NA	NA
5877	EOMES	0	0	0	NA	NA	NA	NA
5890	EPB42	0	0	0	NA	NA	NA	NA
5897	EPGN	0	0	0	NA	NA	NA	NA
5906	EPHA8	0	0	0	NA	NA	NA	NA
5930	EPS8L3	0	0	0	NA	NA	NA	NA
5934	EPYC	0	0	0	NA	NA	NA	NA
5979	ERVFRD-1	0	0	0	NA	NA	NA	NA
5982	ERVV-1	0	0	0	NA	NA	NA	NA
5983	ERVV-2	0	0	0	NA	NA	NA	NA
6002	ESX1	0	0	0	NA	NA	NA	NA
6034	EVX2	0	0	0	NA	NA	NA	NA
6044	EXOC3L2	0	0	0	NA	NA	NA	NA
6045	EXOC3L4	0	0	0	NA	NA	NA	NA
6078	F11	0	0	0	NA	NA	NA	NA
6101	F9	0	0	0	NA	NA	NA	NA
6105	FABP1	0	0	0	NA	NA	NA	NA
6107	FABP2	0	0	0	NA	NA	NA	NA
6114	FABP9	0	0	0	NA	NA	NA	NA
6119	FADS6	0	0	0	NA	NA	NA	NA
6128	FAIM3	0	0	0	NA	NA	NA	NA
6202	FAM138A_loc2	0	0	0	NA	NA	NA	NA
6203	FAM138B	0	0	0	NA	NA	NA	NA
6204	FAM138C	0	0	0	NA	NA	NA	NA
6205	FAM138D	0	0	0	NA	NA	NA	NA
6206	FAM138E	0	0	0	NA	NA	NA	NA
6208	FAM138F_loc2	0	0	0	NA	NA	NA	NA
6215	FAM150A	0	0	0	NA	NA	NA	NA
6219	FAM153A	0	0	0	NA	NA	NA	NA
6220	FAM153B	0	0	0	NA	NA	NA	NA
6221	FAM153C	0	0	0	NA	NA	NA	NA
6242	FAM162B	0	0	0	NA	NA	NA	NA
6255	FAM169B	0	0	0	NA	NA	NA	NA
6256	FAM170A	0	0	0	NA	NA	NA	NA
6257	FAM170B	0	0	0	NA	NA	NA	NA
6291	FAM187B	0	0	0	NA	NA	NA	NA
6312	FAM197Y2P_loc1	0	0	0	NA	NA	NA	NA
6313	FAM197Y2P_loc2	0	0	0	NA	NA	NA	NA
6314	FAM197Y2P_loc3	0	0	0	NA	NA	NA	NA
6315	FAM197Y2P_loc4	0	0	0	NA	NA	NA	NA
6316	FAM197Y2P_loc5	0	0	0	NA	NA	NA	NA
6327	FAM201A	0	0	0	NA	NA	NA	NA
6331	FAM205A	0	0	0	NA	NA	NA	NA
6332	FAM205B	0	0	0	NA	NA	NA	NA
6364	FAM25A	0	0	0	NA	NA	NA	NA
6366	FAM25B_loc2	0	0	0	NA	NA	NA	NA
6367	FAM25B_loc3	0	0	0	NA	NA	NA	NA
6369	FAM25C_loc2	0	0	0	NA	NA	NA	NA
6370	FAM25C_loc3	0	0	0	NA	NA	NA	NA
6371	FAM25G_loc1	0	0	0	NA	NA	NA	NA
6372	FAM25G_loc2	0	0	0	NA	NA	NA	NA
6374	FAM26D	0	0	0	NA	NA	NA	NA
6380	FAM27L	0	0	0	NA	NA	NA	NA
6389	FAM3D	0	0	0	NA	NA	NA	NA
6392	FAM41AY1_loc1	0	0	0	NA	NA	NA	NA
6393	FAM41AY1_loc2	0	0	0	NA	NA	NA	NA
6394	FAM41AY2_loc1	0	0	0	NA	NA	NA	NA
6395	FAM41AY2_loc2	0	0	0	NA	NA	NA	NA
6405	FAM46D	0	0	0	NA	NA	NA	NA
6406	FAM47A	0	0	0	NA	NA	NA	NA
6407	FAM47B	0	0	0	NA	NA	NA	NA
6408	FAM47C	0	0	0	NA	NA	NA	NA
6412	FAM48B1	0	0	0	NA	NA	NA	NA
6413	FAM48B2	0	0	0	NA	NA	NA	NA
6426	FAM55D	0	0	0	NA	NA	NA	NA
6452	FAM71A	0	0	0	NA	NA	NA	NA
6453	FAM71B	0	0	0	NA	NA	NA	NA
6454	FAM71C	0	0	0	NA	NA	NA	NA
6465	FAM74A1	0	0	0	NA	NA	NA	NA
6466	FAM74A2	0	0	0	NA	NA	NA	NA
6467	FAM74A3	0	0	0	NA	NA	NA	NA
6468	FAM74A4	0	0	0	NA	NA	NA	NA
6469	FAM75A1_loc1	0	0	0	NA	NA	NA	NA
6470	FAM75A1_loc2	0	0	0	NA	NA	NA	NA
6471	FAM75A2_loc1	0	0	0	NA	NA	NA	NA
6472	FAM75A2_loc2	0	0	0	NA	NA	NA	NA
6473	FAM75A3	0	0	0	NA	NA	NA	NA
6474	FAM75A4	0	0	0	NA	NA	NA	NA
6475	FAM75A5_loc1	0	0	0	NA	NA	NA	NA
6476	FAM75A5_loc2	0	0	0	NA	NA	NA	NA
6477	FAM75A5_loc3	0	0	0	NA	NA	NA	NA
6478	FAM75A6	0	0	0	NA	NA	NA	NA
6479	FAM75A7_loc1	0	0	0	NA	NA	NA	NA
6480	FAM75A7_loc2	0	0	0	NA	NA	NA	NA
6481	FAM75A7_loc3	0	0	0	NA	NA	NA	NA
6484	FAM75D1	0	0	0	NA	NA	NA	NA
6485	FAM75D3	0	0	0	NA	NA	NA	NA
6486	FAM75D4	0	0	0	NA	NA	NA	NA
6487	FAM75D5	0	0	0	NA	NA	NA	NA
6497	FAM83A	0	0	0	NA	NA	NA	NA
6498	FAM83B	0	0	0	NA	NA	NA	NA
6502	FAM83F	0	0	0	NA	NA	NA	NA
6521	FAM90A13_loc1	0	0	0	NA	NA	NA	NA
6523	FAM90A13_loc3	0	0	0	NA	NA	NA	NA
6524	FAM90A14_loc1	0	0	0	NA	NA	NA	NA
6525	FAM90A14_loc2	0	0	0	NA	NA	NA	NA
6527	FAM90A18_loc1	0	0	0	NA	NA	NA	NA
6530	FAM90A19_loc2	0	0	0	NA	NA	NA	NA
6531	FAM90A20	0	0	0	NA	NA	NA	NA
6537	FAM90A9	0	0	0	NA	NA	NA	NA
6550	FAM99A	0	0	0	NA	NA	NA	NA
6551	FAM99B	0	0	0	NA	NA	NA	NA
6553	FAM9B	0	0	0	NA	NA	NA	NA
6554	FAM9C	0	0	0	NA	NA	NA	NA
6576	FAS-AS1	0	0	0	NA	NA	NA	NA
6577	FASLG	0	0	0	NA	NA	NA	NA
6588	FATE1	0	0	0	NA	NA	NA	NA
6616	FBXL21	0	0	0	NA	NA	NA	NA
6646	FBXO39	0	0	0	NA	NA	NA	NA
6648	FBXO40	0	0	0	NA	NA	NA	NA
6672	FCAMR	0	0	0	NA	NA	NA	NA
6673	FCAR	0	0	0	NA	NA	NA	NA
6674	FCER1A	0	0	0	NA	NA	NA	NA
6685	FCGR3A	0	0	0	NA	NA	NA	NA
6686	FCGR3B	0	0	0	NA	NA	NA	NA
6692	FCN1	0	0	0	NA	NA	NA	NA
6693	FCN2	0	0	0	NA	NA	NA	NA
6695	FCRL1	0	0	0	NA	NA	NA	NA
6696	FCRL2	0	0	0	NA	NA	NA	NA
6697	FCRL3	0	0	0	NA	NA	NA	NA
6698	FCRL4	0	0	0	NA	NA	NA	NA
6699	FCRL5	0	0	0	NA	NA	NA	NA
6700	FCRL6	0	0	0	NA	NA	NA	NA
6703	FDCSP	0	0	0	NA	NA	NA	NA
6720	FER1L6-AS1	0	0	0	NA	NA	NA	NA
6721	FERD3L	0	0	0	NA	NA	NA	NA
6725	FES	0	0	0	NA	NA	NA	NA
6732	FFAR1	0	0	0	NA	NA	NA	NA
6733	FFAR2	0	0	0	NA	NA	NA	NA
6734	FFAR3	0	0	0	NA	NA	NA	NA
6735	FGA	0	0	0	NA	NA	NA	NA
6736	FGB	0	0	0	NA	NA	NA	NA
6738	FGD2	0	0	0	NA	NA	NA	NA
6750	FGF16	0	0	0	NA	NA	NA	NA
6755	FGF20	0	0	0	NA	NA	NA	NA
6757	FGF22	0	0	0	NA	NA	NA	NA
6760	FGF4	0	0	0	NA	NA	NA	NA
6762	FGF6	0	0	0	NA	NA	NA	NA
6766	FGFBP1	0	0	0	NA	NA	NA	NA
6778	FGL1	0	0	0	NA	NA	NA	NA
6780	FGR	0	0	0	NA	NA	NA	NA
6788	FHL5	0	0	0	NA	NA	NA	NA
6797	FIGLA	0	0	0	NA	NA	NA	NA
6833	FLG2	0	0	0	NA	NA	NA	NA
6845	FLJ16171	0	0	0	NA	NA	NA	NA
6846	FLJ16341	0	0	0	NA	NA	NA	NA
6850	FLJ20518_loc2	0	0	0	NA	NA	NA	NA
6854	FLJ22763	0	0	0	NA	NA	NA	NA
6857	FLJ25328	0	0	0	NA	NA	NA	NA
6859	FLJ25758	0	0	0	NA	NA	NA	NA
6860	FLJ26245	0	0	0	NA	NA	NA	NA
6868	FLJ31485	0	0	0	NA	NA	NA	NA
6869	FLJ31662	0	0	0	NA	NA	NA	NA
6880	FLJ34690	0	0	0	NA	NA	NA	NA
6881	FLJ34747	0	0	0	NA	NA	NA	NA
6885	FLJ35424	0	0	0	NA	NA	NA	NA
6903	FLJ40194	0	0	0	NA	NA	NA	NA
6905	FLJ40434	0	0	0	NA	NA	NA	NA
6912	FLJ41941	0	0	0	NA	NA	NA	NA
6913	FLJ42102	0	0	0	NA	NA	NA	NA
6918	FLJ42393	0	0	0	NA	NA	NA	NA
6927	FLJ43860	0	0	0	NA	NA	NA	NA
6928	FLJ43879	0	0	0	NA	NA	NA	NA
6932	FLJ45079	0	0	0	NA	NA	NA	NA
6936	FLJ45974	0	0	0	NA	NA	NA	NA
6937	FLJ45983	0	0	0	NA	NA	NA	NA
6938	FLJ46066	0	0	0	NA	NA	NA	NA
6939	FLJ46257	0	0	0	NA	NA	NA	NA
6940	FLJ46284	0	0	0	NA	NA	NA	NA
6942	FLJ46361	0	0	0	NA	NA	NA	NA
6943	FLJ46446	0	0	0	NA	NA	NA	NA
6968	FMO1	0	0	0	NA	NA	NA	NA
6970	FMO3	0	0	0	NA	NA	NA	NA
6973	FMO6P	0	0	0	NA	NA	NA	NA
6974	FMO9P	0	0	0	NA	NA	NA	NA
6985	FNDC1	0	0	0	NA	NA	NA	NA
6998	FOLH1B	0	0	0	NA	NA	NA	NA
7000	FOLR2	0	0	0	NA	NA	NA	NA
7001	FOLR3	0	0	0	NA	NA	NA	NA
7002	FOLR4	0	0	0	NA	NA	NA	NA
7009	FOXA1	0	0	0	NA	NA	NA	NA
7013	FOXB2	0	0	0	NA	NA	NA	NA
7028	FOXE1	0	0	0	NA	NA	NA	NA
7034	FOXI1	0	0	0	NA	NA	NA	NA
7035	FOXI2	0	0	0	NA	NA	NA	NA
7036	FOXI3	0	0	0	NA	NA	NA	NA
7045	FOXN1	0	0	0	NA	NA	NA	NA
7057	FOXQ1	0	0	0	NA	NA	NA	NA
7059	FOXR2	0	0	0	NA	NA	NA	NA
7067	FPR1	0	0	0	NA	NA	NA	NA
7068	FPR2	0	0	0	NA	NA	NA	NA
7079	FRG2_loc1	0	0	0	NA	NA	NA	NA
7081	FRG2B	0	0	0	NA	NA	NA	NA
7082	FRG2C_loc1	0	0	0	NA	NA	NA	NA
7084	FRK	0	0	0	NA	NA	NA	NA
7085	FRMD1	0	0	0	NA	NA	NA	NA
7097	FRMPD2P1_loc1	0	0	0	NA	NA	NA	NA
7098	FRMPD2P1_loc2	0	0	0	NA	NA	NA	NA
7107	FSCB	0	0	0	NA	NA	NA	NA
7114	FSHB	0	0	0	NA	NA	NA	NA
7122	FSTL5	0	0	0	NA	NA	NA	NA
7126	FTHL17	0	0	0	NA	NA	NA	NA
7128	FTLP10	0	0	0	NA	NA	NA	NA
7129	FTMT	0	0	0	NA	NA	NA	NA
7166	FXYD4	0	0	0	NA	NA	NA	NA
7176	FZD10	0	0	0	NA	NA	NA	NA
7190	G6PC	0	0	0	NA	NA	NA	NA
7198	GAB4	0	0	0	NA	NA	NA	NA
7208	GABRA1	0	0	0	NA	NA	NA	NA
7211	GABRA4	0	0	0	NA	NA	NA	NA
7213	GABRA6	0	0	0	NA	NA	NA	NA
7219	GABRG1	0	0	0	NA	NA	NA	NA
7221	GABRG3	0	0	0	NA	NA	NA	NA
7226	GABRR3	0	0	0	NA	NA	NA	NA
7233	GADL1	0	0	0	NA	NA	NA	NA
7234	GAGE1	0	0	0	NA	NA	NA	NA
7236	GAGE12B_loc1	0	0	0	NA	NA	NA	NA
7237	GAGE12B_loc2	0	0	0	NA	NA	NA	NA
7238	GAGE12B_loc3	0	0	0	NA	NA	NA	NA
7240	GAGE12C_loc2	0	0	0	NA	NA	NA	NA
7241	GAGE12C_loc3	0	0	0	NA	NA	NA	NA
7243	GAGE12C_loc5	0	0	0	NA	NA	NA	NA
7244	GAGE12C_loc6	0	0	0	NA	NA	NA	NA
7246	GAGE12D_loc2	0	0	0	NA	NA	NA	NA
7247	GAGE12D_loc3	0	0	0	NA	NA	NA	NA
7248	GAGE12D_loc4	0	0	0	NA	NA	NA	NA
7250	GAGE12D_loc6	0	0	0	NA	NA	NA	NA
7251	GAGE12E_loc1	0	0	0	NA	NA	NA	NA
7253	GAGE12E_loc3	0	0	0	NA	NA	NA	NA
7254	GAGE12E_loc4	0	0	0	NA	NA	NA	NA
7255	GAGE12E_loc5	0	0	0	NA	NA	NA	NA
7258	GAGE12F_loc2	0	0	0	NA	NA	NA	NA
7259	GAGE12F_loc3	0	0	0	NA	NA	NA	NA
7260	GAGE12G_loc1	0	0	0	NA	NA	NA	NA
7262	GAGE12G_loc3	0	0	0	NA	NA	NA	NA
7264	GAGE12G_loc5	0	0	0	NA	NA	NA	NA
7265	GAGE12H_loc1	0	0	0	NA	NA	NA	NA
7266	GAGE12H_loc2	0	0	0	NA	NA	NA	NA
7267	GAGE12H_loc3	0	0	0	NA	NA	NA	NA
7270	GAGE12I_loc2	0	0	0	NA	NA	NA	NA
7273	GAGE13	0	0	0	NA	NA	NA	NA
7275	GAGE2A_loc2	0	0	0	NA	NA	NA	NA
7276	GAGE2B	0	0	0	NA	NA	NA	NA
7278	GAGE2D_loc1	0	0	0	NA	NA	NA	NA
7280	GAGE2E_loc1	0	0	0	NA	NA	NA	NA
7281	GAGE2E_loc2	0	0	0	NA	NA	NA	NA
7282	GAGE2E_loc3	0	0	0	NA	NA	NA	NA
7283	GAGE2E_loc4	0	0	0	NA	NA	NA	NA
7286	GAGE6_loc1	0	0	0	NA	NA	NA	NA
7319	GALNTL5	0	0	0	NA	NA	NA	NA
7349	GATA1	0	0	0	NA	NA	NA	NA
7353	GATA5	0	0	0	NA	NA	NA	NA
7354	GATA6	0	0	0	NA	NA	NA	NA
7378	GBP6	0	0	0	NA	NA	NA	NA
7379	GBP7	0	0	0	NA	NA	NA	NA
7382	GC	0	0	0	NA	NA	NA	NA
7392	GCG	0	0	0	NA	NA	NA	NA
7401	GCM2	0	0	0	NA	NA	NA	NA
7405	GCNT3	0	0	0	NA	NA	NA	NA
7410	GDA	0	0	0	NA	NA	NA	NA
7420	GDF2	0	0	0	NA	NA	NA	NA
7421	GDF3	0	0	0	NA	NA	NA	NA
7458	GFRA4	0	0	0	NA	NA	NA	NA
7459	GFRAL	0	0	0	NA	NA	NA	NA
7467	GGNBP1	0	0	0	NA	NA	NA	NA
7473	GGT6	0	0	0	NA	NA	NA	NA
7479	GH1	0	0	0	NA	NA	NA	NA
7480	GH2	0	0	0	NA	NA	NA	NA
7484	GHRH	0	0	0	NA	NA	NA	NA
7485	GHRHR	0	0	0	NA	NA	NA	NA
7496	GIMAP4	0	0	0	NA	NA	NA	NA
7498	GIMAP6	0	0	0	NA	NA	NA	NA
7500	GIMAP8	0	0	0	NA	NA	NA	NA
7506	GIP	0	0	0	NA	NA	NA	NA
7514	GJA10	0	0	0	NA	NA	NA	NA
7517	GJA5	0	0	0	NA	NA	NA	NA
7518	GJA8	0	0	0	NA	NA	NA	NA
7524	GJB4	0	0	0	NA	NA	NA	NA
7526	GJB6	0	0	0	NA	NA	NA	NA
7531	GJD2	0	0	0	NA	NA	NA	NA
7535	GK2	0	0	0	NA	NA	NA	NA
7539	GKN1	0	0	0	NA	NA	NA	NA
7540	GKN2	0	0	0	NA	NA	NA	NA
7557	GLIPR1L1	0	0	0	NA	NA	NA	NA
7567	GLOD5	0	0	0	NA	NA	NA	NA
7584	GLT6D1	0	0	0	NA	NA	NA	NA
7598	GLYATL3	0	0	0	NA	NA	NA	NA
7599	GLYCAM1	0	0	0	NA	NA	NA	NA
7611	GML	0	0	0	NA	NA	NA	NA
7634	GNAT3	0	0	0	NA	NA	NA	NA
7655	GNGT2	0	0	0	NA	NA	NA	NA
7688	GOLGA6L1	0	0	0	NA	NA	NA	NA
7692	GOLGA6L6	0	0	0	NA	NA	NA	NA
7712	GOLT1A	0	0	0	NA	NA	NA	NA
7726	GP2	0	0	0	NA	NA	NA	NA
7729	GP9	0	0	0	NA	NA	NA	NA
7756	GPHB5	0	0	0	NA	NA	NA	NA
7769	GPR101	0	0	0	NA	NA	NA	NA
7777	GPR115	0	0	0	NA	NA	NA	NA
7785	GPR128	0	0	0	NA	NA	NA	NA
7786	GPR132	0	0	0	NA	NA	NA	NA
7793	GPR141	0	0	0	NA	NA	NA	NA
7794	GPR142	0	0	0	NA	NA	NA	NA
7796	GPR144	0	0	0	NA	NA	NA	NA
7798	GPR148	0	0	0	NA	NA	NA	NA
7799	GPR149	0	0	0	NA	NA	NA	NA
7800	GPR15	0	0	0	NA	NA	NA	NA
7809	GPR160	0	0	0	NA	NA	NA	NA
7813	GPR171	0	0	0	NA	NA	NA	NA
7815	GPR172B	0	0	0	NA	NA	NA	NA
7825	GPR20	0	0	0	NA	NA	NA	NA
7828	GPR25	0	0	0	NA	NA	NA	NA
7829	GPR26	0	0	0	NA	NA	NA	NA
7830	GPR27	0	0	0	NA	NA	NA	NA
7832	GPR31	0	0	0	NA	NA	NA	NA
7834	GPR33	0	0	0	NA	NA	NA	NA
7840	GPR4	0	0	0	NA	NA	NA	NA
7842	GPR50	0	0	0	NA	NA	NA	NA
7846	GPR6	0	0	0	NA	NA	NA	NA
7851	GPR65	0	0	0	NA	NA	NA	NA
7855	GPR77	0	0	0	NA	NA	NA	NA
7856	GPR78	0	0	0	NA	NA	NA	NA
7859	GPR84	0	0	0	NA	NA	NA	NA
7874	GPRC5D	0	0	0	NA	NA	NA	NA
7875	GPRC6A	0	0	0	NA	NA	NA	NA
7877	GPRIN2	0	0	0	NA	NA	NA	NA
7890	GPX5_loc1	0	0	0	NA	NA	NA	NA
7891	GPX6	0	0	0	NA	NA	NA	NA
7910	GREM1	0	0	0	NA	NA	NA	NA
7914	GRHL3	0	0	0	NA	NA	NA	NA
7948	GRM3	0	0	0	NA	NA	NA	NA
7949	GRM4	0	0	0	NA	NA	NA	NA
7955	GRP	0	0	0	NA	NA	NA	NA
7965	GSC2	0	0	0	NA	NA	NA	NA
7981	GSTA2	0	0	0	NA	NA	NA	NA
7982	GSTA3	0	0	0	NA	NA	NA	NA
7984	GSTA5	0	0	0	NA	NA	NA	NA
7997	GSTT1	0	0	0	NA	NA	NA	NA
8001	GSTTP1	0	0	0	NA	NA	NA	NA
8002	GSTTP2	0	0	0	NA	NA	NA	NA
8048	GTSF1L	0	0	0	NA	NA	NA	NA
8051	GUCA1C	0	0	0	NA	NA	NA	NA
8052	GUCA2A	0	0	0	NA	NA	NA	NA
8053	GUCA2B	0	0	0	NA	NA	NA	NA
8060	GUCY2E	0	0	0	NA	NA	NA	NA
8062	GUCY2GP	0	0	0	NA	NA	NA	NA
8076	GVINP1	0	0	0	NA	NA	NA	NA
8083	GYPA	0	0	0	NA	NA	NA	NA
8084	GYPB	0	0	0	NA	NA	NA	NA
8086	GYPE	0	0	0	NA	NA	NA	NA
8090	GZMA	0	0	0	NA	NA	NA	NA
8092	GZMH	0	0	0	NA	NA	NA	NA
8093	GZMK	0	0	0	NA	NA	NA	NA
8098	H1FOO	0	0	0	NA	NA	NA	NA
8124	HAAO	0	0	0	NA	NA	NA	NA
8135	HAMP	0	0	0	NA	NA	NA	NA
8136	HAND1	0	0	0	NA	NA	NA	NA
8145	HAR1A	0	0	0	NA	NA	NA	NA
8146	HAR1B	0	0	0	NA	NA	NA	NA
8150	HAS1	0	0	0	NA	NA	NA	NA
8163	HAVCR1	0	0	0	NA	NA	NA	NA
8168	HBB	0	0	0	NA	NA	NA	NA
8169	HBBP1	0	0	0	NA	NA	NA	NA
8170	HBD	0	0	0	NA	NA	NA	NA
8171	HBE1	0	0	0	NA	NA	NA	NA
8173	HBG1	0	0	0	NA	NA	NA	NA
8174	HBG2	0	0	0	NA	NA	NA	NA
8175	HBM	0	0	0	NA	NA	NA	NA
8181	HCAR1	0	0	0	NA	NA	NA	NA
8193	HCG26_loc1	0	0	0	NA	NA	NA	NA
8195	HCG4_loc1	0	0	0	NA	NA	NA	NA
8200	HCN1	0	0	0	NA	NA	NA	NA
8240	HEATR7B2	0	0	0	NA	NA	NA	NA
8241	HEATR8	0	0	0	NA	NA	NA	NA
8250	HECW2	0	0	0	NA	NA	NA	NA
8259	HENMT1	0	0	0	NA	NA	NA	NA
8262	HEPH	0	0	0	NA	NA	NA	NA
8293	HEYL	0	0	0	NA	NA	NA	NA
8295	HFE2	0	0	0	NA	NA	NA	NA
8310	HHLA2	0	0	0	NA	NA	NA	NA
8339	HIPK4	0	0	0	NA	NA	NA	NA
8348	HIST1H2AA	0	0	0	NA	NA	NA	NA
8360	HIST1H2APS1	0	0	0	NA	NA	NA	NA
8361	HIST1H2BA	0	0	0	NA	NA	NA	NA
8384	HIST1H3I	0	0	0	NA	NA	NA	NA
8391	HIST1H4F	0	0	0	NA	NA	NA	NA
8392	HIST1H4G	0	0	0	NA	NA	NA	NA
8397	HIST1H4L	0	0	0	NA	NA	NA	NA
8421	HIST4H4	0	0	0	NA	NA	NA	NA
8475	HMGCLL1	0	0	0	NA	NA	NA	NA
8478	HMGCS2	0	0	0	NA	NA	NA	NA
8488	HMHB1	0	0	0	NA	NA	NA	NA
8493	HMSD	0	0	0	NA	NA	NA	NA
8500	HNF1A-AS1	0	0	0	NA	NA	NA	NA
8502	HNF4A	0	0	0	NA	NA	NA	NA
8541	HORMAD1	0	0	0	NA	NA	NA	NA
8559	HOXB1	0	0	0	NA	NA	NA	NA
8561	HOXB13-AS1	0	0	0	NA	NA	NA	NA
8564	HOXB4	0	0	0	NA	NA	NA	NA
8572	HOXC12	0	0	0	NA	NA	NA	NA
8596	HPGDS	0	0	0	NA	NA	NA	NA
8609	HPYR1	0	0	0	NA	NA	NA	NA
8615	HRC	0	0	0	NA	NA	NA	NA
8631	HS3ST4	0	0	0	NA	NA	NA	NA
8633	HS3ST6	0	0	0	NA	NA	NA	NA
8640	HSD11B1	0	0	0	NA	NA	NA	NA
8649	HSD17B2	0	0	0	NA	NA	NA	NA
8656	HSD3B1	0	0	0	NA	NA	NA	NA
8672	HSFY1_loc1	0	0	0	NA	NA	NA	NA
8674	HSFY1P1	0	0	0	NA	NA	NA	NA
8676	HSFY2_loc2	0	0	0	NA	NA	NA	NA
8722	HTN1	0	0	0	NA	NA	NA	NA
8723	HTN3	0	0	0	NA	NA	NA	NA
8724	HTR1A	0	0	0	NA	NA	NA	NA
8727	HTR1E	0	0	0	NA	NA	NA	NA
8728	HTR1F	0	0	0	NA	NA	NA	NA
8731	HTR2C	0	0	0	NA	NA	NA	NA
8733	HTR3B	0	0	0	NA	NA	NA	NA
8735	HTR3D	0	0	0	NA	NA	NA	NA
8736	HTR3E	0	0	0	NA	NA	NA	NA
8738	HTR5A	0	0	0	NA	NA	NA	NA
8748	HULC	0	0	0	NA	NA	NA	NA
8757	HYAL4	0	0	0	NA	NA	NA	NA
8758	HYALP1	0	0	0	NA	NA	NA	NA
8762	HYMAI	0	0	0	NA	NA	NA	NA
8765	IAPP	0	0	0	NA	NA	NA	NA
8769	IBSP	0	0	0	NA	NA	NA	NA
8780	ICOS	0	0	0	NA	NA	NA	NA
8798	IDO1	0	0	0	NA	NA	NA	NA
8799	IDO2	0	0	0	NA	NA	NA	NA
8831	IFNA1	0	0	0	NA	NA	NA	NA
8832	IFNA10	0	0	0	NA	NA	NA	NA
8833	IFNA13	0	0	0	NA	NA	NA	NA
8834	IFNA14	0	0	0	NA	NA	NA	NA
8835	IFNA16	0	0	0	NA	NA	NA	NA
8836	IFNA17	0	0	0	NA	NA	NA	NA
8837	IFNA2	0	0	0	NA	NA	NA	NA
8838	IFNA21	0	0	0	NA	NA	NA	NA
8839	IFNA22P	0	0	0	NA	NA	NA	NA
8840	IFNA4	0	0	0	NA	NA	NA	NA
8842	IFNA6	0	0	0	NA	NA	NA	NA
8843	IFNA7	0	0	0	NA	NA	NA	NA
8844	IFNA8	0	0	0	NA	NA	NA	NA
8847	IFNB1	0	0	0	NA	NA	NA	NA
8849	IFNG	0	0	0	NA	NA	NA	NA
8890	IGFL1	0	0	0	NA	NA	NA	NA
8892	IGFL3	0	0	0	NA	NA	NA	NA
8901	IGLL5	0	0	0	NA	NA	NA	NA
8922	IKZF1	0	0	0	NA	NA	NA	NA
8924	IKZF3	0	0	0	NA	NA	NA	NA
8933	IL12B	0	0	0	NA	NA	NA	NA
8934	IL12RB1	0	0	0	NA	NA	NA	NA
8939	IL15	0	0	0	NA	NA	NA	NA
8942	IL17A	0	0	0	NA	NA	NA	NA
8944	IL17C	0	0	0	NA	NA	NA	NA
8960	IL1F10	0	0	0	NA	NA	NA	NA
8968	IL1RN	0	0	0	NA	NA	NA	NA
8969	IL2	0	0	0	NA	NA	NA	NA
8973	IL21	0	0	0	NA	NA	NA	NA
8975	IL22	0	0	0	NA	NA	NA	NA
8976	IL22RA1	0	0	0	NA	NA	NA	NA
8977	IL22RA2	0	0	0	NA	NA	NA	NA
8979	IL23R	0	0	0	NA	NA	NA	NA
8981	IL25	0	0	0	NA	NA	NA	NA
8982	IL26	0	0	0	NA	NA	NA	NA
8983	IL27	0	0	0	NA	NA	NA	NA
8985	IL28A	0	0	0	NA	NA	NA	NA
8986	IL28B	0	0	0	NA	NA	NA	NA
8987	IL28RA	0	0	0	NA	NA	NA	NA
8988	IL29	0	0	0	NA	NA	NA	NA
8989	IL2RA	0	0	0	NA	NA	NA	NA
8992	IL3	0	0	0	NA	NA	NA	NA
8998	IL36A	0	0	0	NA	NA	NA	NA
8999	IL36B	0	0	0	NA	NA	NA	NA
9000	IL36G	0	0	0	NA	NA	NA	NA
9001	IL36RN	0	0	0	NA	NA	NA	NA
9008	IL5	0	0	0	NA	NA	NA	NA
9016	IL9	0	0	0	NA	NA	NA	NA
9077	INS	0	0	0	NA	NA	NA	NA
9082	INSL3	0	0	0	NA	NA	NA	NA
9084	INSL5	0	0	0	NA	NA	NA	NA
9085	INSL6	0	0	0	NA	NA	NA	NA
9126	IQCF2	0	0	0	NA	NA	NA	NA
9127	IQCF3	0	0	0	NA	NA	NA	NA
9128	IQCF4	0	0	0	NA	NA	NA	NA
9129	IQCF5	0	0	0	NA	NA	NA	NA
9130	IQCF6	0	0	0	NA	NA	NA	NA
9133	IQCJ	0	0	0	NA	NA	NA	NA
9161	IRGC	0	0	0	NA	NA	NA	NA
9166	IRS4	0	0	0	NA	NA	NA	NA
9179	ISL1	0	0	0	NA	NA	NA	NA
9183	ISM1	0	0	0	NA	NA	NA	NA
9189	ISX	0	0	0	NA	NA	NA	NA
9224	ITGB6	0	0	0	NA	NA	NA	NA
9228	ITIH1	0	0	0	NA	NA	NA	NA
9235	ITLN1	0	0	0	NA	NA	NA	NA
9236	ITLN2	0	0	0	NA	NA	NA	NA
9242	ITPK1-AS1	0	0	0	NA	NA	NA	NA
9255	IVL	0	0	0	NA	NA	NA	NA
9260	IZUMO2	0	0	0	NA	NA	NA	NA
9328	KBTBD13	0	0	0	NA	NA	NA	NA
9336	KC6	0	0	0	NA	NA	NA	NA
9339	KCNA10	0	0	0	NA	NA	NA	NA
9342	KCNA4	0	0	0	NA	NA	NA	NA
9352	KCNC2	0	0	0	NA	NA	NA	NA
9353	KCNC3	0	0	0	NA	NA	NA	NA
9361	KCNE3	0	0	0	NA	NA	NA	NA
9368	KCNH1	0	0	0	NA	NA	NA	NA
9380	KCNIP4-IT1	0	0	0	NA	NA	NA	NA
9387	KCNJ15	0	0	0	NA	NA	NA	NA
9403	KCNK17	0	0	0	NA	NA	NA	NA
9404	KCNK18	0	0	0	NA	NA	NA	NA
9408	KCNK5	0	0	0	NA	NA	NA	NA
9434	KCNU1	0	0	0	NA	NA	NA	NA
9435	KCNV1	0	0	0	NA	NA	NA	NA
9448	KCTD19	0	0	0	NA	NA	NA	NA
9485	KERA	0	0	0	NA	NA	NA	NA
9491	KHDRBS2	0	0	0	NA	NA	NA	NA
9554	KIAA1210	0	0	0	NA	NA	NA	NA
9634	KIF2B	0	0	0	NA	NA	NA	NA
9652	KIR2DL1	0	0	0	NA	NA	NA	NA
9653	KIR2DL3	0	0	0	NA	NA	NA	NA
9654	KIR2DL4_loc1	0	0	0	NA	NA	NA	NA
9655	KIR2DS4	0	0	0	NA	NA	NA	NA
9656	KIR3DL1	0	0	0	NA	NA	NA	NA
9657	KIR3DL2	0	0	0	NA	NA	NA	NA
9658	KIR3DL3	0	0	0	NA	NA	NA	NA
9659	KIR3DX1	0	0	0	NA	NA	NA	NA
9663	KIRREL3-AS3	0	0	0	NA	NA	NA	NA
9664	KISS1	0	0	0	NA	NA	NA	NA
9668	KL	0	0	0	NA	NA	NA	NA
9679	KLF14	0	0	0	NA	NA	NA	NA
9702	KLHL1	0	0	0	NA	NA	NA	NA
9738	KLK11	0	0	0	NA	NA	NA	NA
9739	KLK12	0	0	0	NA	NA	NA	NA
9742	KLK15	0	0	0	NA	NA	NA	NA
9746	KLK5	0	0	0	NA	NA	NA	NA
9748	KLK7	0	0	0	NA	NA	NA	NA
9749	KLK8	0	0	0	NA	NA	NA	NA
9750	KLK9	0	0	0	NA	NA	NA	NA
9763	KLRF2	0	0	0	NA	NA	NA	NA
9768	KNCN	0	0	0	NA	NA	NA	NA
9770	KNG1	0	0	0	NA	NA	NA	NA
9785	KRBOX1	0	0	0	NA	NA	NA	NA
9792	KRT1	0	0	0	NA	NA	NA	NA
9805	KRT19P2	0	0	0	NA	NA	NA	NA
9806	KRT2	0	0	0	NA	NA	NA	NA
9808	KRT222	0	0	0	NA	NA	NA	NA
9810	KRT24	0	0	0	NA	NA	NA	NA
9811	KRT25	0	0	0	NA	NA	NA	NA
9812	KRT26	0	0	0	NA	NA	NA	NA
9813	KRT27	0	0	0	NA	NA	NA	NA
9814	KRT28	0	0	0	NA	NA	NA	NA
9815	KRT3	0	0	0	NA	NA	NA	NA
9816	KRT31	0	0	0	NA	NA	NA	NA
9817	KRT32	0	0	0	NA	NA	NA	NA
9818	KRT33A	0	0	0	NA	NA	NA	NA
9819	KRT33B	0	0	0	NA	NA	NA	NA
9820	KRT34	0	0	0	NA	NA	NA	NA
9821	KRT35	0	0	0	NA	NA	NA	NA
9823	KRT37	0	0	0	NA	NA	NA	NA
9824	KRT38	0	0	0	NA	NA	NA	NA
9825	KRT39	0	0	0	NA	NA	NA	NA
9826	KRT4	0	0	0	NA	NA	NA	NA
9827	KRT40	0	0	0	NA	NA	NA	NA
9831	KRT6B	0	0	0	NA	NA	NA	NA
9835	KRT72	0	0	0	NA	NA	NA	NA
9836	KRT73	0	0	0	NA	NA	NA	NA
9837	KRT74	0	0	0	NA	NA	NA	NA
9839	KRT76	0	0	0	NA	NA	NA	NA
9840	KRT77	0	0	0	NA	NA	NA	NA
9841	KRT78	0	0	0	NA	NA	NA	NA
9846	KRT82	0	0	0	NA	NA	NA	NA
9847	KRT83	0	0	0	NA	NA	NA	NA
9848	KRT84	0	0	0	NA	NA	NA	NA
9853	KRTAP1-1	0	0	0	NA	NA	NA	NA
9854	KRTAP1-3	0	0	0	NA	NA	NA	NA
9855	KRTAP1-5	0	0	0	NA	NA	NA	NA
9856	KRTAP10-1	0	0	0	NA	NA	NA	NA
9857	KRTAP10-10	0	0	0	NA	NA	NA	NA
9858	KRTAP10-11	0	0	0	NA	NA	NA	NA
9859	KRTAP10-12	0	0	0	NA	NA	NA	NA
9860	KRTAP10-2	0	0	0	NA	NA	NA	NA
9861	KRTAP10-3	0	0	0	NA	NA	NA	NA
9862	KRTAP10-4	0	0	0	NA	NA	NA	NA
9863	KRTAP10-5	0	0	0	NA	NA	NA	NA
9864	KRTAP10-6	0	0	0	NA	NA	NA	NA
9865	KRTAP10-7	0	0	0	NA	NA	NA	NA
9866	KRTAP10-8	0	0	0	NA	NA	NA	NA
9867	KRTAP10-9	0	0	0	NA	NA	NA	NA
9868	KRTAP11-1	0	0	0	NA	NA	NA	NA
9869	KRTAP12-1	0	0	0	NA	NA	NA	NA
9870	KRTAP12-2	0	0	0	NA	NA	NA	NA
9871	KRTAP12-3	0	0	0	NA	NA	NA	NA
9872	KRTAP12-4	0	0	0	NA	NA	NA	NA
9873	KRTAP13-1	0	0	0	NA	NA	NA	NA
9874	KRTAP13-2	0	0	0	NA	NA	NA	NA
9875	KRTAP13-3	0	0	0	NA	NA	NA	NA
9876	KRTAP13-4	0	0	0	NA	NA	NA	NA
9877	KRTAP15-1	0	0	0	NA	NA	NA	NA
9878	KRTAP16-1	0	0	0	NA	NA	NA	NA
9879	KRTAP17-1	0	0	0	NA	NA	NA	NA
9880	KRTAP19-1	0	0	0	NA	NA	NA	NA
9881	KRTAP19-2	0	0	0	NA	NA	NA	NA
9882	KRTAP19-3	0	0	0	NA	NA	NA	NA
9883	KRTAP19-4	0	0	0	NA	NA	NA	NA
9884	KRTAP19-5	0	0	0	NA	NA	NA	NA
9885	KRTAP19-6	0	0	0	NA	NA	NA	NA
9886	KRTAP19-7	0	0	0	NA	NA	NA	NA
9887	KRTAP19-8	0	0	0	NA	NA	NA	NA
9888	KRTAP2-1	0	0	0	NA	NA	NA	NA
9889	KRTAP2-2	0	0	0	NA	NA	NA	NA
9890	KRTAP2-4	0	0	0	NA	NA	NA	NA
9891	KRTAP20-1	0	0	0	NA	NA	NA	NA
9892	KRTAP20-2	0	0	0	NA	NA	NA	NA
9893	KRTAP20-3	0	0	0	NA	NA	NA	NA
9894	KRTAP20-4	0	0	0	NA	NA	NA	NA
9897	KRTAP21-3	0	0	0	NA	NA	NA	NA
9898	KRTAP22-1	0	0	0	NA	NA	NA	NA
9899	KRTAP22-2	0	0	0	NA	NA	NA	NA
9900	KRTAP23-1	0	0	0	NA	NA	NA	NA
9901	KRTAP24-1	0	0	0	NA	NA	NA	NA
9902	KRTAP25-1	0	0	0	NA	NA	NA	NA
9903	KRTAP26-1	0	0	0	NA	NA	NA	NA
9904	KRTAP27-1	0	0	0	NA	NA	NA	NA
9905	KRTAP3-1	0	0	0	NA	NA	NA	NA
9906	KRTAP3-2	0	0	0	NA	NA	NA	NA
9907	KRTAP3-3	0	0	0	NA	NA	NA	NA
9908	KRTAP4-1	0	0	0	NA	NA	NA	NA
9909	KRTAP4-11	0	0	0	NA	NA	NA	NA
9910	KRTAP4-12	0	0	0	NA	NA	NA	NA
9911	KRTAP4-2	0	0	0	NA	NA	NA	NA
9912	KRTAP4-3	0	0	0	NA	NA	NA	NA
9913	KRTAP4-4	0	0	0	NA	NA	NA	NA
9914	KRTAP4-5	0	0	0	NA	NA	NA	NA
9915	KRTAP4-6	0	0	0	NA	NA	NA	NA
9916	KRTAP4-7	0	0	0	NA	NA	NA	NA
9917	KRTAP4-8	0	0	0	NA	NA	NA	NA
9918	KRTAP4-9	0	0	0	NA	NA	NA	NA
9923	KRTAP5-3	0	0	0	NA	NA	NA	NA
9925	KRTAP5-5	0	0	0	NA	NA	NA	NA
9930	KRTAP6-1	0	0	0	NA	NA	NA	NA
9931	KRTAP6-2	0	0	0	NA	NA	NA	NA
9932	KRTAP6-3	0	0	0	NA	NA	NA	NA
9933	KRTAP7-1	0	0	0	NA	NA	NA	NA
9934	KRTAP8-1	0	0	0	NA	NA	NA	NA
9935	KRTAP9-1	0	0	0	NA	NA	NA	NA
9936	KRTAP9-2	0	0	0	NA	NA	NA	NA
9937	KRTAP9-3	0	0	0	NA	NA	NA	NA
9938	KRTAP9-4	0	0	0	NA	NA	NA	NA
9939	KRTAP9-8	0	0	0	NA	NA	NA	NA
9940	KRTAP9-9	0	0	0	NA	NA	NA	NA
9953	L1TD1	0	0	0	NA	NA	NA	NA
9961	LACRT	0	0	0	NA	NA	NA	NA
9967	LAIR1	0	0	0	NA	NA	NA	NA
9968	LAIR2	0	0	0	NA	NA	NA	NA
10015	LBP	0	0	0	NA	NA	NA	NA
10022	LCE1A	0	0	0	NA	NA	NA	NA
10023	LCE1B	0	0	0	NA	NA	NA	NA
10027	LCE1F	0	0	0	NA	NA	NA	NA
10028	LCE2A	0	0	0	NA	NA	NA	NA
10029	LCE2B	0	0	0	NA	NA	NA	NA
10030	LCE2C	0	0	0	NA	NA	NA	NA
10031	LCE2D	0	0	0	NA	NA	NA	NA
10032	LCE3A	0	0	0	NA	NA	NA	NA
10033	LCE3B	0	0	0	NA	NA	NA	NA
10034	LCE3C	0	0	0	NA	NA	NA	NA
10035	LCE3D	0	0	0	NA	NA	NA	NA
10036	LCE3E	0	0	0	NA	NA	NA	NA
10037	LCE4A	0	0	0	NA	NA	NA	NA
10038	LCE5A	0	0	0	NA	NA	NA	NA
10039	LCE6A	0	0	0	NA	NA	NA	NA
10044	LCN1	0	0	0	NA	NA	NA	NA
10046	LCN12	0	0	0	NA	NA	NA	NA
10048	LCN2	0	0	0	NA	NA	NA	NA
10049	LCN6	0	0	0	NA	NA	NA	NA
10050	LCN8	0	0	0	NA	NA	NA	NA
10051	LCN9	0	0	0	NA	NA	NA	NA
10069	LDLRAD1	0	0	0	NA	NA	NA	NA
10077	LECT2	0	0	0	NA	NA	NA	NA
10082	LELP1	0	0	0	NA	NA	NA	NA
10091	LEP	0	0	0	NA	NA	NA	NA
10102	LEUTX	0	0	0	NA	NA	NA	NA
10105	LGALS12	0	0	0	NA	NA	NA	NA
10106	LGALS13	0	0	0	NA	NA	NA	NA
10107	LGALS14	0	0	0	NA	NA	NA	NA
10108	LGALS16	0	0	0	NA	NA	NA	NA
10109	LGALS17A	0	0	0	NA	NA	NA	NA
10130	LGSN	0	0	0	NA	NA	NA	NA
10132	LHCGR	0	0	0	NA	NA	NA	NA
10138	LHFPL5	0	0	0	NA	NA	NA	NA
10146	LHX8	0	0	0	NA	NA	NA	NA
10154	LILRA1	0	0	0	NA	NA	NA	NA
10156	LILRA3	0	0	0	NA	NA	NA	NA
10157	LILRA4	0	0	0	NA	NA	NA	NA
10160	LILRB1	0	0	0	NA	NA	NA	NA
10161	LILRB2	0	0	0	NA	NA	NA	NA
10164	LILRB5	0	0	0	NA	NA	NA	NA
10165	LILRP2	0	0	0	NA	NA	NA	NA
10166	LIM2	0	0	0	NA	NA	NA	NA
10191	LINC00028	0	0	0	NA	NA	NA	NA
10194	LINC00051	0	0	0	NA	NA	NA	NA
10201	LINC00102	0	0	0	NA	NA	NA	NA
10202	LINC00111	0	0	0	NA	NA	NA	NA
10204	LINC00113	0	0	0	NA	NA	NA	NA
10205	LINC00114	0	0	0	NA	NA	NA	NA
10209	LINC00158	0	0	0	NA	NA	NA	NA
10211	LINC00160	0	0	0	NA	NA	NA	NA
10212	LINC00161	0	0	0	NA	NA	NA	NA
10213	LINC00162	0	0	0	NA	NA	NA	NA
10221	LINC00200	0	0	0	NA	NA	NA	NA
10227	LINC00207	0	0	0	NA	NA	NA	NA
10228	LINC00208	0	0	0	NA	NA	NA	NA
10229	LINC00221	0	0	0	NA	NA	NA	NA
10232	LINC00229	0	0	0	NA	NA	NA	NA
10233	LINC00230A_loc1	0	0	0	NA	NA	NA	NA
10235	LINC00230B_loc1	0	0	0	NA	NA	NA	NA
10236	LINC00230B_loc2	0	0	0	NA	NA	NA	NA
10239	LINC00239	0	0	0	NA	NA	NA	NA
10245	LINC00251	0	0	0	NA	NA	NA	NA
10246	LINC00254	0	0	0	NA	NA	NA	NA
10251	LINC00264	0	0	0	NA	NA	NA	NA
10255	LINC00272	0	0	0	NA	NA	NA	NA
10256	LINC00273	0	0	0	NA	NA	NA	NA
10260	LINC00290	0	0	0	NA	NA	NA	NA
10261	LINC00293	0	0	0	NA	NA	NA	NA
10263	LINC00299	0	0	0	NA	NA	NA	NA
10264	LINC00301	0	0	0	NA	NA	NA	NA
10267	LINC00305	0	0	0	NA	NA	NA	NA
10268	LINC00307	0	0	0	NA	NA	NA	NA
10269	LINC00308	0	0	0	NA	NA	NA	NA
10270	LINC00309	0	0	0	NA	NA	NA	NA
10274	LINC00313	0	0	0	NA	NA	NA	NA
10275	LINC00314	0	0	0	NA	NA	NA	NA
10276	LINC00317	0	0	0	NA	NA	NA	NA
10283	LINC00336	0	0	0	NA	NA	NA	NA
10290	LINC00410	0	0	0	NA	NA	NA	NA
10293	LINC00442	0	0	0	NA	NA	NA	NA
10298	LINC00469	0	0	0	NA	NA	NA	NA
10303	LINC00474	0	0	0	NA	NA	NA	NA
10308	LINC00479	0	0	0	NA	NA	NA	NA
10309	LINC00482	0	0	0	NA	NA	NA	NA
10310	LINC00483	0	0	0	NA	NA	NA	NA
10311	LINC00485	0	0	0	NA	NA	NA	NA
10314	LINC00488	0	0	0	NA	NA	NA	NA
10322	LINC00521	0	0	0	NA	NA	NA	NA
10331	LINGO4	0	0	0	NA	NA	NA	NA
10334	LIPC	0	0	0	NA	NA	NA	NA
10341	LIPK	0	0	0	NA	NA	NA	NA
10342	LIPM	0	0	0	NA	NA	NA	NA
10343	LIPN	0	0	0	NA	NA	NA	NA
10353	LMAN1L	0	0	0	NA	NA	NA	NA
10377	LMX1A	0	0	0	NA	NA	NA	NA
10386	LOC100093698	0	0	0	NA	NA	NA	NA
10393	LOC100128023	0	0	0	NA	NA	NA	NA
10397	LOC100128098	0	0	0	NA	NA	NA	NA
10404	LOC100128264	0	0	0	NA	NA	NA	NA
10410	LOC100128420	0	0	0	NA	NA	NA	NA
10411	LOC100128496	0	0	0	NA	NA	NA	NA
10412	LOC100128505	0	0	0	NA	NA	NA	NA
10414	LOC100128554	0	0	0	NA	NA	NA	NA
10416	LOC100128590	0	0	0	NA	NA	NA	NA
10417	LOC100128593	0	0	0	NA	NA	NA	NA
10433	LOC100129055	0	0	0	NA	NA	NA	NA
10437	LOC100129175	0	0	0	NA	NA	NA	NA
10444	LOC100129345	0	0	0	NA	NA	NA	NA
10449	LOC100129427	0	0	0	NA	NA	NA	NA
10451	LOC100129515	0	0	0	NA	NA	NA	NA
10453	LOC100129520	0	0	0	NA	NA	NA	NA
10463	LOC100129794	0	0	0	NA	NA	NA	NA
10469	LOC100129935	0	0	0	NA	NA	NA	NA
10479	LOC100130264	0	0	0	NA	NA	NA	NA
10486	LOC100130386	0	0	0	NA	NA	NA	NA
10489	LOC100130452	0	0	0	NA	NA	NA	NA
10490	LOC100130480	0	0	0	NA	NA	NA	NA
10494	LOC100130673	0	0	0	NA	NA	NA	NA
10496	LOC100130700	0	0	0	NA	NA	NA	NA
10499	LOC100130849	0	0	0	NA	NA	NA	NA
10502	LOC100130880	0	0	0	NA	NA	NA	NA
10505	LOC100130899	0	0	0	NA	NA	NA	NA
10507	LOC100130954	0	0	0	NA	NA	NA	NA
10510	LOC100131047	0	0	0	NA	NA	NA	NA
10516	LOC100131138	0	0	0	NA	NA	NA	NA
10522	LOC100131289	0	0	0	NA	NA	NA	NA
10525	LOC100131366	0	0	0	NA	NA	NA	NA
10533	LOC100131726	0	0	0	NA	NA	NA	NA
10539	LOC100132078	0	0	0	NA	NA	NA	NA
10551	LOC100132396	0	0	0	NA	NA	NA	NA
10552	LOC100132526	0	0	0	NA	NA	NA	NA
10555	LOC100132735	0	0	0	NA	NA	NA	NA
10556	LOC100132741	0	0	0	NA	NA	NA	NA
10558	LOC100132781	0	0	0	NA	NA	NA	NA
10565	LOC100133123	0	0	0	NA	NA	NA	NA
10567	LOC100133267_loc1	0	0	0	NA	NA	NA	NA
10568	LOC100133267_loc2	0	0	0	NA	NA	NA	NA
10570	LOC100133308	0	0	0	NA	NA	NA	NA
10576	LOC100133445	0	0	0	NA	NA	NA	NA
10577	LOC100133461	0	0	0	NA	NA	NA	NA
10579	LOC100133669	0	0	0	NA	NA	NA	NA
10593	LOC100144597	0	0	0	NA	NA	NA	NA
10597	LOC100169752	0	0	0	NA	NA	NA	NA
10603	LOC100190940	0	0	0	NA	NA	NA	NA
10607	LOC100192426	0	0	0	NA	NA	NA	NA
10611	LOC100233209	0	0	0	NA	NA	NA	NA
10613	LOC100240735	0	0	0	NA	NA	NA	NA
10615	LOC100270679	0	0	0	NA	NA	NA	NA
10616	LOC100270746	0	0	0	NA	NA	NA	NA
10627	LOC100286922	0	0	0	NA	NA	NA	NA
10642	LOC100287704	0	0	0	NA	NA	NA	NA
10643	LOC100287718	0	0	0	NA	NA	NA	NA
10646	LOC100287792	0	0	0	NA	NA	NA	NA
10647	LOC100287814	0	0	0	NA	NA	NA	NA
10648	LOC100287834_loc1	0	0	0	NA	NA	NA	NA
10649	LOC100287834_loc2	0	0	0	NA	NA	NA	NA
10654	LOC100288077	0	0	0	NA	NA	NA	NA
10656	LOC100288122	0	0	0	NA	NA	NA	NA
10660	LOC100288255_loc1	0	0	0	NA	NA	NA	NA
10665	LOC100288524	0	0	0	NA	NA	NA	NA
10666	LOC100288570_loc1	0	0	0	NA	NA	NA	NA
10667	LOC100288570_loc2	0	0	0	NA	NA	NA	NA
10670	LOC100288748	0	0	0	NA	NA	NA	NA
10702	LOC100303749	0	0	0	NA	NA	NA	NA
10706	LOC100329135	0	0	0	NA	NA	NA	NA
10721	LOC100500938	0	0	0	NA	NA	NA	NA
10722	LOC100505474	0	0	0	NA	NA	NA	NA
10723	LOC100505478	0	0	0	NA	NA	NA	NA
10728	LOC100505545	0	0	0	NA	NA	NA	NA
10731	LOC100505583	0	0	0	NA	NA	NA	NA
10732	LOC100505619	0	0	0	NA	NA	NA	NA
10733	LOC100505622	0	0	0	NA	NA	NA	NA
10738	LOC100505659	0	0	0	NA	NA	NA	NA
10749	LOC100505718	0	0	0	NA	NA	NA	NA
10753	LOC100505768	0	0	0	NA	NA	NA	NA
10754	LOC100505776	0	0	0	NA	NA	NA	NA
10755	LOC100505782	0	0	0	NA	NA	NA	NA
10757	LOC100505795	0	0	0	NA	NA	NA	NA
10764	LOC100505839	0	0	0	NA	NA	NA	NA
10771	LOC100505918	0	0	0	NA	NA	NA	NA
10773	LOC100505964	0	0	0	NA	NA	NA	NA
10776	LOC100505989	0	0	0	NA	NA	NA	NA
10782	LOC100506035	0	0	0	NA	NA	NA	NA
10784	LOC100506050	0	0	0	NA	NA	NA	NA
10789	LOC100506085	0	0	0	NA	NA	NA	NA
10790	LOC100506122	0	0	0	NA	NA	NA	NA
10794	LOC100506134	0	0	0	NA	NA	NA	NA
10796	LOC100506172	0	0	0	NA	NA	NA	NA
10799	LOC100506195	0	0	0	NA	NA	NA	NA
10801	LOC100506229	0	0	0	NA	NA	NA	NA
10803	LOC100506241	0	0	0	NA	NA	NA	NA
10813	LOC100506388	0	0	0	NA	NA	NA	NA
10814	LOC100506393	0	0	0	NA	NA	NA	NA
10818	LOC100506422	0	0	0	NA	NA	NA	NA
10832	LOC100506650	0	0	0	NA	NA	NA	NA
10842	LOC100506733	0	0	0	NA	NA	NA	NA
10852	LOC100506835	0	0	0	NA	NA	NA	NA
10860	LOC100506939	0	0	0	NA	NA	NA	NA
10868	LOC100507050	0	0	0	NA	NA	NA	NA
10876	LOC100507096	0	0	0	NA	NA	NA	NA
10879	LOC100507140	0	0	0	NA	NA	NA	NA
10885	LOC100507205	0	0	0	NA	NA	NA	NA
10898	LOC100507334	0	0	0	NA	NA	NA	NA
10902	LOC100507362_loc8	0	0	0	NA	NA	NA	NA
10904	LOC100507377	0	0	0	NA	NA	NA	NA
10905	LOC100507387	0	0	0	NA	NA	NA	NA
10906	LOC100507389	0	0	0	NA	NA	NA	NA
10907	LOC100507391	0	0	0	NA	NA	NA	NA
10908	LOC100507392	0	0	0	NA	NA	NA	NA
10918	LOC100507443	0	0	0	NA	NA	NA	NA
10927	LOC100507537	0	0	0	NA	NA	NA	NA
10934	LOC100507584	0	0	0	NA	NA	NA	NA
10937	LOC100507600	0	0	0	NA	NA	NA	NA
10938	LOC100507605	0	0	0	NA	NA	NA	NA
10939	LOC100507629	0	0	0	NA	NA	NA	NA
10940	LOC100507632	0	0	0	NA	NA	NA	NA
10942	LOC100507651	0	0	0	NA	NA	NA	NA
10943	LOC100509575	0	0	0	NA	NA	NA	NA
10944	LOC100526771	0	0	0	NA	NA	NA	NA
10948	LOC100628307	0	0	0	NA	NA	NA	NA
10964	LOC120824	0	0	0	NA	NA	NA	NA
10965	LOC126536	0	0	0	NA	NA	NA	NA
10966	LOC127841	0	0	0	NA	NA	NA	NA
10974	LOC144817	0	0	0	NA	NA	NA	NA
10975	LOC145216	0	0	0	NA	NA	NA	NA
10976	LOC145474	0	0	0	NA	NA	NA	NA
10982	LOC146336	0	0	0	NA	NA	NA	NA
10984	LOC146513	0	0	0	NA	NA	NA	NA
10986	LOC147093	0	0	0	NA	NA	NA	NA
10991	LOC148145	0	0	0	NA	NA	NA	NA
10996	LOC148824	0	0	0	NA	NA	NA	NA
10997	LOC149086	0	0	0	NA	NA	NA	NA
11001	LOC149950	0	0	0	NA	NA	NA	NA
11002	LOC150185	0	0	0	NA	NA	NA	NA
11005	LOC150527_loc1	0	0	0	NA	NA	NA	NA
11006	LOC150527_loc2	0	0	0	NA	NA	NA	NA
11010	LOC150935	0	0	0	NA	NA	NA	NA
11013	LOC151174	0	0	0	NA	NA	NA	NA
11014	LOC151300	0	0	0	NA	NA	NA	NA
11022	LOC152578	0	0	0	NA	NA	NA	NA
11026	LOC153910	0	0	0	NA	NA	NA	NA
11032	LOC154872	0	0	0	NA	NA	NA	NA
11034	LOC157273	0	0	0	NA	NA	NA	NA
11043	LOC170425	0	0	0	NA	NA	NA	NA
11045	LOC200261	0	0	0	NA	NA	NA	NA
11048	LOC201477	0	0	0	NA	NA	NA	NA
11050	LOC201651	0	0	0	NA	NA	NA	NA
11057	LOC221122	0	0	0	NA	NA	NA	NA
11066	LOC254312	0	0	0	NA	NA	NA	NA
11069	LOC255025	0	0	0	NA	NA	NA	NA
11072	LOC255411	0	0	0	NA	NA	NA	NA
11075	LOC255654	0	0	0	NA	NA	NA	NA
11080	LOC282980	0	0	0	NA	NA	NA	NA
11082	LOC283033	0	0	0	NA	NA	NA	NA
11093	LOC283214	0	0	0	NA	NA	NA	NA
11094	LOC283299	0	0	0	NA	NA	NA	NA
11095	LOC283332	0	0	0	NA	NA	NA	NA
11097	LOC283392	0	0	0	NA	NA	NA	NA
11098	LOC283403	0	0	0	NA	NA	NA	NA
11104	LOC283585	0	0	0	NA	NA	NA	NA
11105	LOC283587	0	0	0	NA	NA	NA	NA
11113	LOC283731	0	0	0	NA	NA	NA	NA
11119	LOC283914	0	0	0	NA	NA	NA	NA
11125	LOC284215	0	0	0	NA	NA	NA	NA
11128	LOC284294	0	0	0	NA	NA	NA	NA
11130	LOC284379	0	0	0	NA	NA	NA	NA
11137	LOC284551	0	0	0	NA	NA	NA	NA
11141	LOC284632	0	0	0	NA	NA	NA	NA
11146	LOC284757	0	0	0	NA	NA	NA	NA
11147	LOC284788	0	0	0	NA	NA	NA	NA
11148	LOC284798	0	0	0	NA	NA	NA	NA
11149	LOC284801	0	0	0	NA	NA	NA	NA
11151	LOC284865	0	0	0	NA	NA	NA	NA
11171	LOC285501	0	0	0	NA	NA	NA	NA
11175	LOC285577	0	0	0	NA	NA	NA	NA
11177	LOC285626	0	0	0	NA	NA	NA	NA
11178	LOC285627	0	0	0	NA	NA	NA	NA
11180	LOC285692	0	0	0	NA	NA	NA	NA
11182	LOC285740	0	0	0	NA	NA	NA	NA
11184	LOC285762	0	0	0	NA	NA	NA	NA
11193	LOC285972	0	0	0	NA	NA	NA	NA
11196	LOC286083	0	0	0	NA	NA	NA	NA
11198	LOC286114	0	0	0	NA	NA	NA	NA
11199	LOC286135	0	0	0	NA	NA	NA	NA
11200	LOC286177	0	0	0	NA	NA	NA	NA
11202	LOC286186	0	0	0	NA	NA	NA	NA
11203	LOC286189	0	0	0	NA	NA	NA	NA
11205	LOC286238	0	0	0	NA	NA	NA	NA
11208	LOC286359	0	0	0	NA	NA	NA	NA
11212	LOC286442	0	0	0	NA	NA	NA	NA
11214	LOC338579	0	0	0	NA	NA	NA	NA
11215	LOC338588	0	0	0	NA	NA	NA	NA
11221	LOC338862	0	0	0	NA	NA	NA	NA
11222	LOC338963	0	0	0	NA	NA	NA	NA
11223	LOC339166	0	0	0	NA	NA	NA	NA
11226	LOC339298	0	0	0	NA	NA	NA	NA
11227	LOC339442	0	0	0	NA	NA	NA	NA
11231	LOC339535	0	0	0	NA	NA	NA	NA
11232	LOC339568	0	0	0	NA	NA	NA	NA
11236	LOC339788	0	0	0	NA	NA	NA	NA
11238	LOC339807	0	0	0	NA	NA	NA	NA
11239	LOC339822	0	0	0	NA	NA	NA	NA
11244	LOC340017	0	0	0	NA	NA	NA	NA
11246	LOC340073	0	0	0	NA	NA	NA	NA
11247	LOC340074	0	0	0	NA	NA	NA	NA
11248	LOC340094	0	0	0	NA	NA	NA	NA
11249	LOC340107	0	0	0	NA	NA	NA	NA
11250	LOC340113	0	0	0	NA	NA	NA	NA
11251	LOC340357	0	0	0	NA	NA	NA	NA
11259	LOC347411	0	0	0	NA	NA	NA	NA
11263	LOC349196_loc1	0	0	0	NA	NA	NA	NA
11269	LOC375295	0	0	0	NA	NA	NA	NA
11279	LOC388276	0	0	0	NA	NA	NA	NA
11283	LOC388588	0	0	0	NA	NA	NA	NA
11289	LOC388942	0	0	0	NA	NA	NA	NA
11290	LOC388946	0	0	0	NA	NA	NA	NA
11292	LOC389023	0	0	0	NA	NA	NA	NA
11293	LOC389033	0	0	0	NA	NA	NA	NA
11294	LOC389043	0	0	0	NA	NA	NA	NA
11298	LOC389493	0	0	0	NA	NA	NA	NA
11300	LOC389641	0	0	0	NA	NA	NA	NA
11301	LOC389676	0	0	0	NA	NA	NA	NA
11308	LOC390705_loc1	0	0	0	NA	NA	NA	NA
11314	LOC392232	0	0	0	NA	NA	NA	NA
11315	LOC392364	0	0	0	NA	NA	NA	NA
11316	LOC399708	0	0	0	NA	NA	NA	NA
11322	LOC399939_loc2	0	0	0	NA	NA	NA	NA
11323	LOC399940_loc1	0	0	0	NA	NA	NA	NA
11324	LOC399940_loc2	0	0	0	NA	NA	NA	NA
11327	LOC400084	0	0	0	NA	NA	NA	NA
11334	LOC400620	0	0	0	NA	NA	NA	NA
11335	LOC400643	0	0	0	NA	NA	NA	NA
11336	LOC400654	0	0	0	NA	NA	NA	NA
11337	LOC400655	0	0	0	NA	NA	NA	NA
11340	LOC400685	0	0	0	NA	NA	NA	NA
11342	LOC400794	0	0	0	NA	NA	NA	NA
11347	LOC400958	0	0	0	NA	NA	NA	NA
11354	LOC401109	0	0	0	NA	NA	NA	NA
11356	LOC401134	0	0	0	NA	NA	NA	NA
11358	LOC401177	0	0	0	NA	NA	NA	NA
11365	LOC401463	0	0	0	NA	NA	NA	NA
11366	LOC401557	0	0	0	NA	NA	NA	NA
11369	LOC402160	0	0	0	NA	NA	NA	NA
11370	LOC402779	0	0	0	NA	NA	NA	NA
11371	LOC404266	0	0	0	NA	NA	NA	NA
11375	LOC439950	0	0	0	NA	NA	NA	NA
11376	LOC439990	0	0	0	NA	NA	NA	NA
11380	LOC440041	0	0	0	NA	NA	NA	NA
11381	LOC440117	0	0	0	NA	NA	NA	NA
11382	LOC440131	0	0	0	NA	NA	NA	NA
11395	LOC440518	0	0	0	NA	NA	NA	NA
11399	LOC440704	0	0	0	NA	NA	NA	NA
11402	LOC440895_loc1	0	0	0	NA	NA	NA	NA
11403	LOC440895_loc2	0	0	0	NA	NA	NA	NA
11412	LOC441025	0	0	0	NA	NA	NA	NA
11419	LOC441495_loc1	0	0	0	NA	NA	NA	NA
11420	LOC441495_loc2	0	0	0	NA	NA	NA	NA
11427	LOC442497	0	0	0	NA	NA	NA	NA
11432	LOC503519	0	0	0	NA	NA	NA	NA
11441	LOC554223_loc8	0	0	0	NA	NA	NA	NA
11451	LOC63930	0	0	0	NA	NA	NA	NA
11454	LOC641365	0	0	0	NA	NA	NA	NA
11457	LOC641515	0	0	0	NA	NA	NA	NA
11462	LOC642426	0	0	0	NA	NA	NA	NA
11467	LOC642929	0	0	0	NA	NA	NA	NA
11475	LOC643486	0	0	0	NA	NA	NA	NA
11479	LOC643650	0	0	0	NA	NA	NA	NA
11491	LOC644145	0	0	0	NA	NA	NA	NA
11493	LOC644189	0	0	0	NA	NA	NA	NA
11496	LOC644248	0	0	0	NA	NA	NA	NA
11500	LOC644669	0	0	0	NA	NA	NA	NA
11502	LOC644838	0	0	0	NA	NA	NA	NA
11509	LOC645355	0	0	0	NA	NA	NA	NA
11517	LOC645949	0	0	0	NA	NA	NA	NA
11518	LOC646168	0	0	0	NA	NA	NA	NA
11520	LOC646268	0	0	0	NA	NA	NA	NA
11525	LOC646498	0	0	0	NA	NA	NA	NA
11526	LOC646508	0	0	0	NA	NA	NA	NA
11529	LOC646627	0	0	0	NA	NA	NA	NA
11531	LOC646743_loc1	0	0	0	NA	NA	NA	NA
11532	LOC646743_loc2	0	0	0	NA	NA	NA	NA
11541	LOC647107	0	0	0	NA	NA	NA	NA
11543	LOC647589	0	0	0	NA	NA	NA	NA
11547	LOC648691	0	0	0	NA	NA	NA	NA
11551	LOC649133	0	0	0	NA	NA	NA	NA
11562	LOC653486	0	0	0	NA	NA	NA	NA
11574	LOC727677	0	0	0	NA	NA	NA	NA
11580	LOC727915	0	0	0	NA	NA	NA	NA
11583	LOC728012	0	0	0	NA	NA	NA	NA
11592	LOC728342	0	0	0	NA	NA	NA	NA
11593	LOC728369_loc1	0	0	0	NA	NA	NA	NA
11594	LOC728369_loc2	0	0	0	NA	NA	NA	NA
11595	LOC728369_loc3	0	0	0	NA	NA	NA	NA
11596	LOC728369_loc4	0	0	0	NA	NA	NA	NA
11597	LOC728369_loc5	0	0	0	NA	NA	NA	NA
11598	LOC728369_loc6	0	0	0	NA	NA	NA	NA
11599	LOC728369_loc7	0	0	0	NA	NA	NA	NA
11600	LOC728369_loc8	0	0	0	NA	NA	NA	NA
11601	LOC728373_loc1	0	0	0	NA	NA	NA	NA
11602	LOC728373_loc2	0	0	0	NA	NA	NA	NA
11603	LOC728373_loc3	0	0	0	NA	NA	NA	NA
11604	LOC728373_loc4	0	0	0	NA	NA	NA	NA
11605	LOC728373_loc5	0	0	0	NA	NA	NA	NA
11606	LOC728373_loc6	0	0	0	NA	NA	NA	NA
11607	LOC728373_loc7	0	0	0	NA	NA	NA	NA
11608	LOC728373_loc8	0	0	0	NA	NA	NA	NA
11609	LOC728377	0	0	0	NA	NA	NA	NA
11610	LOC728379_loc1	0	0	0	NA	NA	NA	NA
11611	LOC728379_loc2	0	0	0	NA	NA	NA	NA
11612	LOC728379_loc3	0	0	0	NA	NA	NA	NA
11613	LOC728379_loc4	0	0	0	NA	NA	NA	NA
11614	LOC728379_loc5	0	0	0	NA	NA	NA	NA
11615	LOC728379_loc6	0	0	0	NA	NA	NA	NA
11616	LOC728379_loc7	0	0	0	NA	NA	NA	NA
11617	LOC728379_loc8	0	0	0	NA	NA	NA	NA
11619	LOC728393_loc1	0	0	0	NA	NA	NA	NA
11620	LOC728393_loc2	0	0	0	NA	NA	NA	NA
11621	LOC728393_loc3	0	0	0	NA	NA	NA	NA
11622	LOC728393_loc4	0	0	0	NA	NA	NA	NA
11623	LOC728393_loc5	0	0	0	NA	NA	NA	NA
11624	LOC728393_loc6	0	0	0	NA	NA	NA	NA
11625	LOC728393_loc7	0	0	0	NA	NA	NA	NA
11626	LOC728393_loc8	0	0	0	NA	NA	NA	NA
11627	LOC728400_loc1	0	0	0	NA	NA	NA	NA
11628	LOC728400_loc2	0	0	0	NA	NA	NA	NA
11629	LOC728400_loc3	0	0	0	NA	NA	NA	NA
11630	LOC728400_loc4	0	0	0	NA	NA	NA	NA
11631	LOC728400_loc5	0	0	0	NA	NA	NA	NA
11632	LOC728400_loc6	0	0	0	NA	NA	NA	NA
11633	LOC728400_loc7	0	0	0	NA	NA	NA	NA
11634	LOC728400_loc8	0	0	0	NA	NA	NA	NA
11635	LOC728405_loc1	0	0	0	NA	NA	NA	NA
11636	LOC728405_loc2	0	0	0	NA	NA	NA	NA
11637	LOC728405_loc3	0	0	0	NA	NA	NA	NA
11638	LOC728405_loc4	0	0	0	NA	NA	NA	NA
11639	LOC728405_loc5	0	0	0	NA	NA	NA	NA
11640	LOC728405_loc6	0	0	0	NA	NA	NA	NA
11641	LOC728405_loc7	0	0	0	NA	NA	NA	NA
11642	LOC728405_loc8	0	0	0	NA	NA	NA	NA
11652	LOC728716	0	0	0	NA	NA	NA	NA
11665	LOC728978	0	0	0	NA	NA	NA	NA
11669	LOC729041	0	0	0	NA	NA	NA	NA
11670	LOC729059	0	0	0	NA	NA	NA	NA
11672	LOC729121	0	0	0	NA	NA	NA	NA
[truncated: 22,314 more rows]
